# Supplementary material for: Horizontally-transferred T-DNA and haplotype-based phylogenetic analysis uncovers the origin of sweetpotato
Source: Research Square preprint supplement (doi:10.21203/rs.3.rs-2350975/v1), 2022-12-20
Supplement: Supplementary file 1 [file 22be65f2a725f0fb334a670b.xlsx]

## Sheet: Table 1
	Supplementary Table 1 The detailed information of plant materials used in this study
Name	ID	Accession ID	Species	Clade	Group	Ploid	Sequencing depth	Data source	Provider	IbT-DNA1_PCR	IbT-DNA2_PCR	IbT-DNA1_WGS	IbT-DNA2_WGS	Storage root formation	Country of origin	Location	Latitude	Longitude
	PI634798	PI634798	Ipomoea triloba	Outgroup	1	2	High	This study	USDA			-	-	No	USA
553012	PI553012	PI553012	Ipomoea tenuissima	Outgroup	1	2	High	This study	USDA	++++	-	+	-	Unkown	USA	Long Pine Key, Everglades National Park, Dade County	25.3997	-80.6575
K134-1	K134_1	K134_1	Ipomoea tiliacea	Outgroup	1	4	High	This study	NARO			-	-	Unkown	Mexico	Mexico	17.1116	-94.7618
K270-1	K270_1	K270_1	Ipomoea tiliacea	Outgroup	1	4	High	This study	NARO			-	-	Unkown	Mexico	Puerto Rico?	18.1505	-99.2516
K300-3	K300_3	K300_3	Ipomoea tiliacea	Outgroup	1	4	High	This study	NARO			-	-	Unkown	Ecuador	Esmeralda, Ecuador	0.969433	-79.6366
ECAL2305.2-1	ECAL_2305(2)_1	ECAL_2305(2)_1	Ipomoea tiliacea	Outgroup	1	4	High	This study	NARO			-	-	Unkown	Mexico	Lerdo, Veracruz, Mexico	18.1134	-94.4113
561544	PI561544	PI561544	Ipomoea trifida	I. trifida	2	2	High	This study	USDA			-	-	Unkown	Venezuela		6.76775	-64.9802
CIP460026	CIP460026	CIP460026	Ipomoea trifida	I. trifida	2	2	High	Muñoz‐Rodríguez P, Wells T, Wood J R I, et al. Discovery and characterization of sweetpotato’s closest tetraploid relative[J]. New Phytologist, 2022, 234(4): 1185-1196.				-	-	Unkown	Colombia		11.3	-74.33
CIP460663	CIP460663	CIP460663	Ipomoea trifida	I. trifida	2	2	High	Muñoz‐Rodríguez P, Wells T, Wood J R I, et al. Discovery and characterization of sweetpotato’s closest tetraploid relative[J]. New Phytologist, 2022, 234(4): 1185-1196.				-	-	Unkown	Mexico		16.75	-93.1213
430406	CIP430406	CIP430406	Ipomoea trifida	I. trifida	2	2	High	This study	CIP	-	+	-	-	Unkown	Unknown
Y22	CIP698014	CIP698014	Ipomoea trifida	I. trifida	2	2	High	Li M, Yang S, Xu W, et al. The wild sweetpotato (Ipomoea trifida) genome provides insights into storage root development[J]. BMC plant biology, 2019, 19(1): 119.		-	+	-	+	Yes	Unknown		23.8837	-42.3762
PI197	Grif 6197	Grif 6197	Ipomoea trifida	Not used in the analysis	Not used in the analysis	2	Low	This study	USDA			-	-	Unkown	Mexico	40 kilometers south of Tuxtla Gtrez-villaflore
PI200B	Grif 6200B	Grif 6200	Ipomoea trifida	Not used in the analysis	Not used in the analysis	2	Low	This study	USDA			-	-	Unkown	Mexico	10 kilometers northwest of Poluta-zorcua
PI200	Grif 6200	Grif 6200	Ipomoea trifida	Not used in the analysis	Not used in the analysis	2	Low	This study	USDA			-	-	Unkown	Mexico	10 kilometers northwest of Poluta-zorcua
PI543	PI 561543	PI 561543	Ipomoea trifida	Not used in the analysis	Not used in the analysis	2	Low	This study	USDA			-	-	Unkown	Costa Rica
PI544	PI 561544	PI 561544	Ipomoea trifida	Not used in the analysis	Not used in the analysis	2	Low	This study	USDA			-	-	Unkown	Venezuela
PI547	PI 561547	PI 561547	Ipomoea trifida	Not used in the analysis	Not used in the analysis	2	Low	This study	USDA			-	+	Unkown	Guatemala
PI548	PI 561548	PI 561548	Ipomoea trifida	Not used in the analysis	Not used in the analysis	2	Low	This study	USDA			-	-	Unkown	Guatemala
PI716	PI 540716	PI 540716	Ipomoea trifida	Not used in the analysis	Not used in the analysis	2	Low	This study	USDA			-	-	Unkown	Colombia	28km E Cartagena-Barrangvilla, Cartagena Province.
PI719B	PI 540719	PI 540719	Ipomoea trifida	Not used in the analysis	Not used in the analysis	2	Low	This study	USDA			-	-	Unkown	Colombia	5km E Barranquilla-Santa Marta, Barranquilla Province.
PI720	PI 540720	PI 540720	Ipomoea trifida	Not used in the analysis	Not used in the analysis	2	Low	This study	USDA			-	-	Unkown	Colombia	20km E Barranquilla, Santa Marta, Cienaga Province.
PI721B	PI 540721B	PI 540721	Ipomoea trifida	Not used in the analysis	Not used in the analysis	2	Low	This study	USDA			-	-	Unkown	Colombia	13km S Rodadero-Cienaga, Santa Marta Province.
PI721	PI 540721	PI 540721	Ipomoea trifida	Not used in the analysis	Not used in the analysis	2	Low	This study	USDA			-	-	Unkown	Colombia	13km S Rodadero-Cienaga, Santa Marta Province.
PI724	PI 540724	PI 540724	Ipomoea trifida	Not used in the analysis	Not used in the analysis	2	Low	This study	USDA			-	-	Unkown	Colombia	29km S Fundacion-Copey, Fundacion Province.
PI725B	PI 540725	PI 540725	Ipomoea trifida	Not used in the analysis	Not used in the analysis	2	Low	This study	USDA			-	+	Unkown	Colombia	9km S Copey-Bosconia, Bosconia Province.
PI728B	PI 540728B	PI 540728	Ipomoea trifida	Not used in the analysis	Not used in the analysis	2	Low	This study	USDA			-	-	Unkown	Colombia	3km SW Bosconia-Plato, Bosconia Province.
PI728	PI 540728	PI 540728	Ipomoea trifida	Not used in the analysis	Not used in the analysis	2	Low	This study	USDA			-	-	Unkown	Colombia	3km SW Bosconia-Plato, Bosconia Province.
PI729B	PI 540729B	PI 540729	Ipomoea trifida	Not used in the analysis	Not used in the analysis	2	Low	This study	USDA			-	-	Unkown	Colombia	5km SW El Dificil-Apure, El Dificil Province.
PI729	PI 540729	PI 540729	Ipomoea trifida	Not used in the analysis	Not used in the analysis	2	Low	This study	USDA			-	-	Unkown	Colombia	5km SW El Dificil-Apure, El Dificil Province.
PI730	PI 540730	PI 540730	Ipomoea trifida	Not used in the analysis	Not used in the analysis	2	Low	This study	USDA			-	-	Unkown	Colombia	5km SW Apure-Plato, Plato Province.
PI788B	PI 634788	PI 634788	Ipomoea trifida	Not used in the analysis	Not used in the analysis	2	Low	This study	USDA			-	-	Unkown	Japan
PI791	PI 634791	PI 634791	Ipomoea trifida	Not used in the analysis	Not used in the analysis	2	Low	This study	USDA			-	-	Unkown	Mexicoico
PI792	PI 634792	PI 634792	Ipomoea trifida	Not used in the analysis	Not used in the analysis	2	Low	This study	USDA			-	-	Unkown	Mexicoico
PI815	PI 543815	PI 543815	Ipomoea trifida	Not used in the analysis	Not used in the analysis	2	Low	This study	USDA			-	-	Unkown	Costa Rica	Plants sprawling on ground, fencing and along drive, 0.3km E of entrance to Playa Ocotal.
PI824B	PI 543824	PI 543824	Ipomoea trifida	Not used in the analysis	Not used in the analysis	2	Low	This study	USDA			-	+	Unkown	Costa Rica
PI825B	PI 543825B	PI 543825	Ipomoea trifida	Not used in the analysis	Not used in the analysis	2	Low	This study	USDA			-	+	Unkown	Costa Rica
PI825	PI 543825	PI 543825	Ipomoea trifida	Not used in the analysis	Not used in the analysis	2	Low	This study	USDA			-	-	Unkown	Costa Rica
PI829	PI 543829	PI 543829	Ipomoea trifida	Not used in the analysis	Not used in the analysis	2	Low	This study	USDA			-	+	Unkown	Costa Rica
PI046A	PI561246	PI561246	Ipomoea aequatoriensis	Ecuador 4x	3	4	High	This study	USDA	-	-	-	+	No	Ecuador	Entr Esmeralda D Rosa Zarate, Esmeralda, Esmeraldas Province	-0.95	-79.6667
PI561246ox	PI561246ox	PI561246	Ipomoea aequatoriensis	Ecuador 4x	3	4	High	Muñoz‐Rodríguez P, Wells T, Wood J R I, et al. Discovery and characterization of sweetpotato’s closest tetraploid relative[J]. New Phytologist, 2022, 234(4): 1185-1196.				-	+	No	Ecuador	Entr Esmeralda D Rosa Zarate, Esmeralda, Esmeraldas Province	-0.95	-79.6667
PI047A	PI561247	PI561247	Ipomoea aequatoriensis	Ecuador 4x	3	4	High	This study	USDA	-	+	-	+	No	Ecuador	Entr A Sua D Esmeralda, Sua, Esmeraldas, Province	-0.866667	-79.1667
PI048A	PI561248	PI561248	Ipomoea aequatoriensis	Ecuador 4x	3	4	High	This study	USDA	-	+	-	+	No	Ecuador	Km 5 Ant D Esmeralda Quininde, Esmeralda, Esmeraldas Province	-0.833333	-79.75
PI561248ox	PI561248ox	PI561248	Ipomoea aequatoriensis	Ecuador 4x	3	4	High	Muñoz‐Rodríguez P, Wells T, Wood J R I, et al. Discovery and characterization of sweetpotato’s closest tetraploid relative[J]. New Phytologist, 2022, 234(4): 1185-1196.				-	+	No	Ecuador	Km 5 Ant D Esmeralda Quininde, Esmeralda, Esmeraldas Province	-0.833333	-79.75
PI055A	PI561255	PI561255	Ipomoea aequatoriensis	Ecuador 4x	3	4	High	This study	USDA	-	+	-	+	No	Ecuador	Via Julio Moreno, Guayaquil, Guayas Province	-2.06667	-80.0833
PI561255ox	PI561255ox	PI561255	Ipomoea aequatoriensis	Ecuador 4x	3	4	High	Muñoz‐Rodríguez P, Wells T, Wood J R I, et al. Discovery and characterization of sweetpotato’s closest tetraploid relative[J]. New Phytologist, 2022, 234(4): 1185-1196.				-	+	No	Ecuador	Via Julio Moreno, Guayaquil, Guayas Province	-2.06667	-80.0833
PI058A	PI561258	PI561258	Ipomoea aequatoriensis	Ecuador 4x	3	4	High	This study	USDA	--	++	-	+	No	Ecuador	El Guabo, El Oro Province	-3.24884	-79.8214
PI061A	PI561261	PI561261	Ipomoea aequatoriensis	Ecuador 4x	3	4	High	This study	USDA	-	+	-	+	No	Ecuador	Puyango, Loja Province	-3.89637	-80.0872
K300-1	K300_1	K300_1	Ipomoea aequatoriensis	Ecuador 4x	3	4	High	This study	NARO			-	+	Unkown	Ecuador	Esmeralda, Ecuador	0.969433	-79.6366
K300-5	K300_5	K300_5	Ipomoea aequatoriensis	Ecuador 4x	3	4	High	This study	NARO			-	+	Unkown	Ecuador	Esmeralda, Ecuador	0.969433	-79.6366
CH81.2	CH81.2	CH81.2	Ipomoea aequatoriensis	Ecuador 4x	3	4	High	Muñoz‐Rodríguez P, Wells T, Wood J R I, et al. Discovery and characterization of sweetpotato’s closest tetraploid relative[J]. New Phytologist, 2022, 234(4): 1185-1196.				-	-	No	Ecuador		-3.963	-79.7013
CH71.3	CH71.3	CH71.3/PI355830/K300	Ipomoea aequatoriensis multiple hybrid	Ecuador 4x	3	4	High	Muñoz‐Rodríguez P, Wells T, Wood J R I, et al. Discovery and characterization of sweetpotato’s closest tetraploid relative[J]. New Phytologist, 2022, 234(4): 1185-1196.				-	+	No	Ecuador		0.327	-79.434
CH80.3	CH80.3	CH80.3/K500	Ipomoea aequatoriensis multiple hybrid	Colombia hybrid 4x	4	4	High	Muñoz‐Rodríguez P, Wells T, Wood J R I, et al. Discovery and characterization of sweetpotato’s closest tetraploid relative[J]. New Phytologist, 2022, 234(4): 1185-1196.				-	-	No	Colombia		4.7292	-75.5787
K500-1	K500_1	K500_1	Ipomoea aequatoriensis × Ipomoea trifida	Colombia hybrid 4x	4	4	High	This study	NARO			-	-	Unkown	Colombia	Cali, Colombia	3.39129	-76.5222
K500-2	K500_2	K500_2	Ipomoea aequatoriensis × Ipomoea trifida	Colombia hybrid 4x	4	4	High	This study	NARO			-	-	Unkown	Colombia	Cali, Colombia	3.39129	-76.5222
K500-4	K500_4	K500_4	Ipomoea aequatoriensis × Ipomoea trifida	Colombia hybrid 4x	4	4	High	This study	NARO			-	-	Unkown	Colombia	Cali, Colombia	3.39129	-76.5222
403270	CIP403270	CIP403270	Ipomoea aequatoriensis × Ipomoea trifida	Colombia hybrid 4x	4	4	High	This study	CIP	---+	-	+	-	No	Colombia	1 Km Se Circacia-calarca	4.6102	-75.6436
Y413	CIP695141	CIP695141	Ipomoea batatas 4x × Ipomoea aequatoriensis	CIP hybrid 4x	7	4	High	This study	CIP	-	+	+	+	No	CIP, Peru	Articifial hybrid
Y413BGI	CIP695141B	CIP695141B	Ipomoea batatas 4x × Ipomoea aequatoriensis	CIP hybrid 4x	7	4	High	This study	CIP			-	+	No	CIP, Peru	Articifial hybrid
DFA7480	DFA7480	DFA7480	Ipomoea batatas 4x var. apiculata	Basal 4x I	5	4	High	Muñoz‐Rodríguez P, Wells T, Wood J R I, et al. Discovery and characterization of sweetpotato’s closest tetraploid relative[J]. New Phytologist, 2022, 234(4): 1185-1196.				-	-	No	Mexico		27.544	-99.699
K233-1	K233_1	K233_1	Ipomoea batatas 4x var. apiculata	Basal 4x I	5	4	High	This study	NARO			-	-	Unkown	Mexico	Veracruz, Veracruz, Mexico	19.1876	-96.1496
K233ox	K233ox	K233	Ipomoea batatas 4x var. apiculata	Basal 4x I	5	4	High	Muñoz‐Rodríguez P, Wells T, Wood J R I, et al. Discovery and characterization of sweetpotato’s closest tetraploid relative[J]. New Phytologist, 2022, 234(4): 1185-1196.				-	-	No	Mexico	Veracruz, Veracruz, Mexico	19.1876	-96.1496
518474	PI518474	PI518474	Ipomoea batatas 4x var. apiculata	Basal 4x I	5	4	High	This study	USDA	++++	-	+	-	No	Mexico	1 km N of Playa Norte, Veracruz Province	19.2	-96.1667
PI518474ox	PI518474ox	PI518474	Ipomoea batatas 4x var. apiculata	Basal 4x I	5	4	High	Muñoz‐Rodríguez P, Wells T, Wood J R I, et al. Discovery and characterization of sweetpotato’s closest tetraploid relative[J]. New Phytologist, 2022, 234(4): 1185-1196.				+	-	No	Mexico	1 km N of Playa Norte, Veracruz Province	19.2	-96.1667
K300-6	K300_6	K300_6	Ipomoea batatas 4x var. apiculata	Basal 4x I	5	4	High	This study	NARO			-	-	Unkown	Ecuador	Esmeralda, Ecuador	0.969433	-79.6366
ECAL2145.1-1	ECAL_2145(1)_1	ECAL_2145(1)_1	Ipomoea batatas 4x	Basal 4x II	6	4	High	This study	NARO			-	-	Unkown	Guatemala	Mexico-Guatemala frontier, Guatemala	16.0145	-91.5524
ECAL2156.1-1	ECAL_2156(1)_1	ECAL_2156(1)_1	Ipomoea batatas 4x	Basal 4x II	6	4	High	This study	NARO			+	-	Unkown	Guatemala	Guatemala City, Guatemala	14.6368	-90.4709
ECAL2232.3-2	ECAL_2232(3)_2	ECAL_2232(3)_2	Ipomoea batatas 4x	Basal 4x II	6	4	High	This study	NARO			+	-	Unkown	Guatemala	Santa Elena, Guatemala	16.9101	-89.8497
ECAL2156.10-2	ECAL_2156(10)_2	ECAL_2156(10)_2	Ipomoea batatas 4x	Basal 4x II	6	4	High	This study	NARO			+	-	Unkown	Guatemala	Guatemala City, Guatemala	14.6368	-90.4709
PI479	PI518479	PI518479	Ipomoea tabascana	Basal 4x II	6	4	High	This study	USDA			-	-	No	Mexico	2km SW of Ejido Lopez Samora, Balancan Province, Mexico	17.8333	-91.0833
PI518479ox	PI518479ox	PI518479	Ipomoea tabascana	Basal 4x II	6	4	High	Muñoz‐Rodríguez P, Wells T, Wood J R I, et al. Discovery and characterization of sweetpotato’s closest tetraploid relative[J]. New Phytologist, 2022, 234(4): 1185-1196.				-	-	No	Mexico	2km SW of Ejido Lopez Samora, Balancan Province, Mexico	17.8333	-91.0833
ECAL2156.5-1	ECAL_2156(5)_1	ECAL_2156(5)_1	Ipomoea batatas 4x	Basal 4x II	6	4	High	This study	NARO			-	-	Unkown	Guatemala	Guatemala City, Guatemala	14.6368	-90.4709
ECAL2192-2	ECAL_2192_2	ECAL_2192_2	Ipomoea batatas 4x	Basal 4x II	6	4	High	This study	NARO			-	-	Unkown	Guatemala	Gualan, Guatemala	15.1227	-89.3555
ECAL2262-1	ECAL_2262_1	ECAL_2262_1	Ipomoea batatas 4x	Basal 4x II	6	4	High	This study	NARO			-	-	Unkown	Mexico	Teapa, Mexico	18.074	-94.3233
ECAL2293.2-1	ECAL_2293(2)_1	ECAL_2293(2)_1	Ipomoea batatas 4x	Basal 4x II	6	4	High	This study	NARO			-	-	Unkown	Mexico	Montepilo, Mexico	18.6416	-95.0881
Y428	CIP695150	CIP695150	Ipomoea batatas 4x multiple hybrid	CIP hybrid 4x	7	4	High	This study	CIP	-	-	-	-	No	CIP, Peru	CIP articifial hybrid
Y428B	CIP695150B	CIP695150B	Ipomoea batatas 4x multiple hybrid	CIP hybrid 4x	7	4	High	This study	CIP			+	+	No	CIP, Peru	CIP articifial hybrid
Y22-Xu1802	Y22-Xushu18		simulated hybrid	Simulated hybrid	8	4	High	This study								Simulated data
Y22-Y601	Y22-Y601		simulated hybrid	Simulated hybrid	8	4	High	This study								Simulated data
Y22-Yzi7-3	Y22-Yuzi7		simulated hybrid	Simulated hybrid	8	4	High	This study								Simulated data
Tai6	Taizhong6	Taizhong6	Ipomoea batatas 6x	Sweetpotato	9	6	High	Yang J, Moeinzadeh M H, Kuhl H, et al. Haplotype-resolved sweet potato genome traces back its hexaploidization history[J]. Nature plants, 2017, 3(9): 696-703.		+	+	+	+	Yes	China		36.202	117.186
Xu1802	Xushu18	Xushu18	Ipomoea batatas 6x	Sweetpotato	9	6	High	This study		+	+	+	+	Yes	China	Xuzhou Sweetpotato Research Center, Jiangsu, China	34.2836	117.303
Yzi7-3	Yuzi7	Yuzi7	Ipomoea batatas 6x	Sweetpotato	9	6	High	This study		+	+	+	+	Yes	China	Southwest University, Chongqing, China	29.8267	106.431
Y263	Yuzi263	Yuzi263	Ipomoea batatas 6x	Sweetpotato	9	6	High	This study		+	+	+	+	Yes	China	Southwest University, Chongqing, China	29.8267	106.431
Y601	Y601	Y601	Ipomoea batatas 6x	Sweetpotato	9	6	High	This study		+	+	+	+	Yes	Unknown
Beauregard	Beauregard	Beauregard	Ipomoea batatas 6x	Sweetpotato	9	6	High	Wu S, Lau K H, Cao Q, et al. Genome sequences of two diploid wild relatives of cultivated sweetpotato reveal targets for genetic improvement[J]. Nature communications, 2018, 9(1): 1-12.				+	-	Yes	United States	Louisiana State University	30.48	-91.1766
Tanzania	Tanzania	Tanzania	Ipomoea batatas 6x	Sweetpotato	9	6	High	Wu S, Lau K H, Cao Q, et al. Genome sequences of two diploid wild relatives of cultivated sweetpotato reveal targets for genetic improvement[J]. Nature communications, 2018, 9(1): 1-12.				+	+	Yes	Uganda	Iganga, Uganda	0.609764	33.4646
NK259L	NK259L	NK259L	Ipomoea batatas 6x	Sweetpotato	9	6	High	Wu S, Lau K H, Cao Q, et al. Genome sequences of two diploid wild relatives of cultivated sweetpotato reveal targets for genetic improvement[J]. Nature communications, 2018, 9(1): 1-12.				+	+	Yes	Uganda	National Crops Resources Research Institute (NaCRRI), Namulonge, P.O. Box 7084, Kampala, Uganda	0.529021	32.6124
Kabode	Kabode	Kabode (NASPOT 10 O)	Ipomoea batatas 6x	Sweetpotato	9	6	High	Wu S, Lau K H, Cao Q, et al. Genome sequences of two diploid wild relatives of cultivated sweetpotato reveal targets for genetic improvement[J]. Nature communications, 2018, 9(1): 1-12.				+	+	Yes	Uganda	National Crops Resources Research Institute (NaCRRI), Namulonge, P.O. Box 7084, Kampala, Uganda	0.529021	32.6124
Magabali	Magabali	Magabali	Ipomoea batatas 6x	Sweetpotato	9	6	High	Wu S, Lau K H, Cao Q, et al. Genome sequences of two diploid wild relatives of cultivated sweetpotato reveal targets for genetic improvement[J]. Nature communications, 2018, 9(1): 1-12.				+	+	Yes	Uganda	Kabarole District, Uganda	0.620612	30.2707
RedResisto	Resisto	Resisto	Ipomoea batatas 6x	Sweetpotato	9	6	High	Wu S, Lau K H, Cao Q, et al. Genome sequences of two diploid wild relatives of cultivated sweetpotato reveal targets for genetic improvement[J]. Nature communications, 2018, 9(1): 1-12.				+	+	Yes	United States	Us Vegetable Lab.-charleston	32.7853	-79.994
Wagabolige	Wagabolige	Wagabolige	Ipomoea batatas 6x	Sweetpotato	9	6	High	Wu S, Lau K H, Cao Q, et al. Genome sequences of two diploid wild relatives of cultivated sweetpotato reveal targets for genetic improvement[J]. Nature communications, 2018, 9(1): 1-12.				+	-	Yes	Uganda	Iganga, Uganda	0.605375	33.4683
NASPOT5	NASPOT 5	NASPOT 5	Ipomoea batatas 6x	Sweetpotato	9	6	High	Wu S, Lau K H, Cao Q, et al. Genome sequences of two diploid wild relatives of cultivated sweetpotato reveal targets for genetic improvement[J]. Nature communications, 2018, 9(1): 1-12.				+	-	Yes	Uganda	National Crops Resources Research Institute (NaCRRI), Namulonge, P.O. Box 7084, Kampala, Uganda	0.529021	32.6124
CIP100201	NASPOT 11	NASPOT 11	Ipomoea batatas 6x	Sweetpotato	9	6	High	Wu S, Lau K H, Cao Q, et al. Genome sequences of two diploid wild relatives of cultivated sweetpotato reveal targets for genetic improvement[J]. Nature communications, 2018, 9(1): 1-12.				+	+	Yes	Uganda	National Crops Resources Research Institute (NaCRRI), Namulonge, P.O. Box 7084, Kampala, Uganda	0.529021	32.6124
Mugande	Mugande	Mugande	Ipomoea batatas 6x	Sweetpotato	9	6	High	Wu S, Lau K H, Cao Q, et al. Genome sequences of two diploid wild relatives of cultivated sweetpotato reveal targets for genetic improvement[J]. Nature communications, 2018, 9(1): 1-12.				+	+	Yes	Rwanda	Uganda	1.34515	32.4542
Huarmeyano	Huarmeyano	Huarmeyano	Ipomoea batatas 6x	Sweetpotato	9	6	High	Wu S, Lau K H, Cao Q, et al. Genome sequences of two diploid wild relatives of cultivated sweetpotato reveal targets for genetic improvement[J]. Nature communications, 2018, 9(1): 1-12.				+	+	Yes	Peru	Huarmey, Peru	-10.0696	-78.1516
NewKawogo	New Kawogo	New Kawogo	Ipomoea batatas 6x	Sweetpotato	9	6	High	Wu S, Lau K H, Cao Q, et al. Genome sequences of two diploid wild relatives of cultivated sweetpotato reveal targets for genetic improvement[J]. Nature communications, 2018, 9(1): 1-12.				+	+	Yes	Uganda	tall grassland agroecological zone near Kampala, Uganda	0.330288	32.5756
NASPOT1	NASPOT 1	NASPOT 1	Ipomoea batatas 6x	Sweetpotato	9	6	High	Wu S, Lau K H, Cao Q, et al. Genome sequences of two diploid wild relatives of cultivated sweetpotato reveal targets for genetic improvement[J]. Nature communications, 2018, 9(1): 1-12.				+	+	Yes	Uganda	National Crops Resources Research Institute (NaCRRI), Namulonge, P.O. Box 7084, Kampala, Uganda	0.529021	32.6124
Ejumula	Ejumula	Ejumula	Ipomoea batatas 6x	Sweetpotato	9	6	High	Wu S, Lau K H, Cao Q, et al. Genome sequences of two diploid wild relatives of cultivated sweetpotato reveal targets for genetic improvement[J]. Nature communications, 2018, 9(1): 1-12.				+	+	Yes	Uganda	Katakwi District, Uganda	1.9246	33.9841
NASPOT5-58	NASPOT 5/58	NASPOT 5/58	Ipomoea batatas 6x	Sweetpotato	9	6	High	Wu S, Lau K H, Cao Q, et al. Genome sequences of two diploid wild relatives of cultivated sweetpotato reveal targets for genetic improvement[J]. Nature communications, 2018, 9(1): 1-12.				+	-	Yes	Uganda	National Crops Resources Research Institute (NaCRRI), Namulonge, P.O. Box 7084, Kampala, Uganda	0.529021	32.6124
Dimbuka-Bukulula	Dimbuka-Bukulula	Dimbuka-Bukulula	Ipomoea batatas 6x	Sweetpotato	9	6	High	Wu S, Lau K H, Cao Q, et al. Genome sequences of two diploid wild relatives of cultivated sweetpotato reveal targets for genetic improvement[J]. Nature communications, 2018, 9(1): 1-12.				+	+	Yes	Uganda	Bukulula subcounty in Masaka District, Uganda	-0.180955	31.8713
SPK004	Kakamega	Kakamega (SPK004)	Ipomoea batatas 6x	Sweetpotato	9	6	High	Wu S, Lau K H, Cao Q, et al. Genome sequences of two diploid wild relatives of cultivated sweetpotato reveal targets for genetic improvement[J]. Nature communications, 2018, 9(1): 1-12.				+	+	Yes	Kenya	Muguga, Kenya	-1.24951	36.6578
NASPOT7	NASPOT 7	NASPOT 7	Ipomoea batatas 6x	Sweetpotato	9	6	High	Wu S, Lau K H, Cao Q, et al. Genome sequences of two diploid wild relatives of cultivated sweetpotato reveal targets for genetic improvement[J]. Nature communications, 2018, 9(1): 1-12.				+	-	Yes	Uganda	National Crops Resources Research Institute (NaCRRI), Namulonge, P.O. Box 7084, Kampala, Uganda	0.529021	32.6124

## Sheet: Table 2
Supplementary Table 2 Summary of haplotype blocks of five representative sweet potato cultivars/landraces
Material	Huarmeyano	NK259L	Yuzi7
MeanLength	598.55	706.423	439.88
GenomeCoverage	0.631313	0.666344	0.718138
BlockNumber	491500	439555	760769
Ploid2_Number	69518	61683	105859
Ploid3_Number	123107	102801	212370
Ploid4_Number	152249	132712	220439
Ploid5_Number	99433	90433	134634
Ploid6_Number	47193	51926	87467
Ploid2_Percent	0.14144	0.140331	0.139147
Ploid3_Percent	0.250472	0.233875	0.279152
Ploid4_Percent	0.309764	0.301924	0.289758
Ploid5_Percent	0.202305	0.205738	0.176971
Ploid6_Percent	0.0960183	0.118133	0.114972
Ploid2_MeanLength	922.422	1055.29	659.786
Ploid3_MeanLength	660.78	756.643	462.011
Ploid4_MeanLength	480.584	554.506	349.024
Ploid5_MeanLength	392.918	473.244	308.087
Ploid6_MeanLength	772.966	986.951	551.846
Ploid2_GenomeCoverage	0.137609	0.139687	0.149883
Ploid3_GenomeCoverage	0.174566	0.16692	0.210555
Ploid4_GenomeCoverage	0.157016	0.15792	0.165106
Ploid5_GenomeCoverage	0.0838402	0.0918401	0.0890121
Ploid6_GenomeCoverage	0.0782813	0.109977	0.103581
Note: The genome coverage is not accurate because duplicated blocks are not removed

## Sheet: Table 3
Supplementary Table 3 Summary of haplotype blocks of tetraploid accessions
Accession	CIP403270	PI518474	CH71.3	CH80.3	CH81.2	DFA7480	ECAL_2145(1)_1	ECAL_2156(10)_2	ECAL_2156(1)_1	ECAL_2156(5)_1	ECAL_2192_2	ECAL_2232(3)_2	ECAL_2262_1	ECAL_2293(2)_1	K233_1	K233ox	K300_1	K300_5	K300_6	K500_1	K500_2	K500_4	PI561246	PI561247	PI561248	PI561255	PI561258	PI561261	PI518479	PI518474ox	PI518479ox	PI561246ox	PI561248ox	PI561255ox	CIP695141	CIP695141B	CIP695150	CIP695150B
MeanLength	685.158	1225.13	729.668	664.631	597.957	270.67	553.745	452.898	666.12	553.008	561.285	558.312	539.879	521.017	477.9	665.286	564.46	469.937	490.604	503.586	451.821	545.21	1032.69	907.794	1111.54	1103.92	1054.91	964.273	631.523	511.449	668.487	686.122	873.063	687.075	1057.44	602.539	1043.86	694.244
GenomeCoverage	0.797788	1.01296	0.813944	0.789711	0.781147	0.585031	0.755653	0.71665	0.791479	0.747982	0.762652	0.761091	0.755299	0.742649	0.712903	0.797174	0.750727	0.705456	0.712869	0.722129	0.742132	0.744127	0.909297	0.872619	0.910388	0.915478	0.918312	0.887158	0.77098	0.751895	0.798384	0.716748	0.846971	0.717447	0.864335	0.759575	0.884691	0.790009
BlockNumber	542596	385290	519815	553691	608755	1007206	635905	737372	553690	630289	633173	635243	651932	664220	695141	558373	619768	699536	677109	668223	765411	636008	410313	447937	381665	386446	405654	428727	568897	685070	556543	486793	452067	486592	380895	587442	394939	530273
Ploid2_Number	169875	143146	153435	162444	194112	426032	188430	223251	165875	190780	193140	185516	189384	207448	217093	168737	200776	239036	212872	224751	259804	206669	143225	159824	133928	131468	141851	152342	168454	228981	167244	160117	139841	154949	122447	170758	124961	150158
Ploid3_Number	209601	157126	211989	234566	261257	462127	287756	340595	239670	280175	287984	282230	296728	310510	310560	230700	274128	311177	307057	296662	343053	280866	150054	164311	139048	142453	148626	159131	250190	298315	230657	204525	164924	206929	140154	260518	141063	227573
Ploid4_Number	163120	85018	154391	156681	153386	119047	159719	173526	148145	159334	152049	167497	165820	146262	167488	158936	144864	149323	157180	146810	162554	148473	117034	123802	108689	112525	115177	117254	150253	157774	158642	122151	147302	124714	118294	156166	128915	152542
Ploid2_Percent	0.313078	0.371528	0.295172	0.293384	0.318867	0.422984	0.296318	0.302766	0.299581	0.302687	0.305035	0.292039	0.290497	0.312318	0.312301	0.302194	0.323953	0.341707	0.314384	0.336341	0.339431	0.324947	0.349063	0.3568	0.350905	0.340198	0.349685	0.355336	0.296106	0.334245	0.300505	0.328922	0.309337	0.318437	0.321472	0.290681	0.316406	0.283171
Ploid3_Percent	0.386293	0.407812	0.407816	0.423641	0.429166	0.458821	0.452514	0.461904	0.43286	0.444518	0.454827	0.444287	0.455152	0.467481	0.446758	0.413165	0.442307	0.444833	0.453482	0.443957	0.448194	0.441608	0.365706	0.366817	0.364319	0.368623	0.366386	0.371171	0.439781	0.435452	0.414446	0.420148	0.364822	0.425262	0.36796	0.443479	0.357177	0.429162
Ploid4_Percent	0.300629	0.22066	0.297011	0.282976	0.251967	0.118195	0.251168	0.23533	0.267559	0.252795	0.240138	0.263674	0.254352	0.220201	0.240941	0.284641	0.233739	0.21346	0.232134	0.219702	0.212375	0.233445	0.285231	0.276383	0.284776	0.291179	0.283929	0.273493	0.264113	0.230303	0.285049	0.25093	0.325841	0.256301	0.310569	0.265841	0.326417	0.287667
Ploid2_MeanLength	738.517	1174.32	783.446	730.79	683.245	318.33	620.019	515.55	736.681	614.188	632.598	614.15	604.06	601.806	551.858	729.044	648.883	547.018	562.888	580.469	520.031	620.465	1023.18	926.329	1085.37	1072.88	1035.2	975.547	700.674	595.349	736.698	771.325	910.524	761.679	1085.44	657.269	1084.6	742.061
Ploid3_MeanLength	554.13	868.166	604.795	555.341	513.825	234.693	467.111	382.806	555.027	469.177	477.984	472.236	453.83	444.82	399.962	562.965	479.637	397.744	411.492	426.66	392.295	462.162	789.471	715.213	848.515	849.998	813.314	748.729	532.665	437.096	562.867	561.239	704.358	566.217	814.28	507.965	807.253	565.841
Ploid4_MeanLength	797.955	1970.42	847.682	759.656	633.324	239.769	631.641	509.867	766.84	627.163	628.475	641.503	620.558	568.195	526.553	746.119	607.962	496.988	547.255	541.332	468.424	597.559	1356.17	1139.46	1480.27	1461.65	1390.93	1242.15	718.607	530.267	750.143	783.537	1026.39	794.916	1316.56	700.465	1263.26	838.737
Ploid2_GenomeCoverage	0.269222	0.360733	0.257961	0.254751	0.284609	0.291032	0.250712	0.246993	0.262229	0.251451	0.262193	0.244498	0.245496	0.267908	0.257095	0.263988	0.279575	0.280599	0.257135	0.279963	0.289931	0.275178	0.314478	0.317707	0.31194	0.302686	0.315121	0.318925	0.25329	0.292544	0.264399	0.26503	0.273241	0.253268	0.285216	0.240849	0.290847	0.239116
Ploid3_GenomeCoverage	0.249244	0.292733	0.275132	0.279541	0.288074	0.232746	0.288446	0.279794	0.285462	0.282089	0.295394	0.286011	0.288983	0.296401	0.266554	0.278708	0.282154	0.265602	0.271144	0.271621	0.288798	0.278557	0.254217	0.252187	0.253189	0.259842	0.259402	0.255682	0.285986	0.279816	0.278607	0.246328	0.249286	0.251434	0.244906	0.283983	0.244367	0.276335
Ploid4_GenomeCoverage	0.279322	0.359493	0.280851	0.255419	0.208464	0.0612537	0.216495	0.189864	0.243788	0.214442	0.205065	0.230582	0.22082	0.17834	0.189254	0.254478	0.188998	0.159255	0.18459	0.170545	0.163402	0.190392	0.340602	0.302724	0.34526	0.35295	0.34379	0.312552	0.231705	0.179535	0.255377	0.205389	0.324444	0.212744	0.334213	0.234743	0.349476	0.274559
Note: The genome coverage is not accurate because duplicated blocks are not removed

## Sheet: Table 4
Supplementary Table 4 Summary of original extracted syntenic haplotype blocks between sweet potato and tetraploid accessions
Accession	CIP403270	PI518474	CH71.3	CH80.3	CH81.2	DFA7480	ECAL_2145(1)_1	ECAL_2156(10)_2	ECAL_2156(1)_1	ECAL_2156(5)_1	ECAL_2192_2	ECAL_2232(3)_2	ECAL_2262_1	ECAL_2293(2)_1	K233_1	K233ox	K300_1	K300_5	K300_6	K500_1	K500_2	K500_4	PI561246	PI561247	PI561248	PI561255	PI561258	PI561261	PI518479	PI518474ox	PI518479ox	PI561246ox	PI561248ox	PI561255ox	CIP695141	CIP695141B	CIP695150	CIP695150B	CIP403270	PI518474	CH71.3	CH80.3	CH81.2	DFA7480	ECAL_2145(1)_1	ECAL_2156(10)_2	ECAL_2156(1)_1	ECAL_2156(5)_1	ECAL_2192_2
Reference	Huarmeyano	Huarmeyano	Huarmeyano	Huarmeyano	Huarmeyano	Huarmeyano	Huarmeyano	Huarmeyano	Huarmeyano	Huarmeyano	Huarmeyano	Huarmeyano	Huarmeyano	Huarmeyano	Huarmeyano	Huarmeyano	Huarmeyano	Huarmeyano	Huarmeyano	Huarmeyano	Huarmeyano	Huarmeyano	Huarmeyano	Huarmeyano	Huarmeyano	Huarmeyano	Huarmeyano	Huarmeyano	Huarmeyano	Huarmeyano	Huarmeyano	Huarmeyano	Huarmeyano	Huarmeyano	Huarmeyano	Huarmeyano	Huarmeyano	Huarmeyano	NK259L	NK259L	NK259L	NK259L	NK259L	NK259L	NK259L	NK259L	NK259L	NK259L	NK259L
MeanLength	396.257	435.9	405.017	390.646	367.746	196.185	352.906	321.057	389.925	354.312	360.036	360.374	350.243	343.959	328.556	385.838	359.601	329.824	334.621	335.3	307.429	352.451	437.588	423.128	443.649	446.918	440.354	432.916	371.924	335.229	394.448	381.177	425.721	380.593	457.221	374.681	454.479	398.976	454.052	500.28	459.347	444.135	403.722	206.653	390.157	355.509	438.876	394.053	402.801
GenomeCoverage	0.601625	0.694285	0.613193	0.598781	0.588992	0.39059	0.567515	0.544174	0.601412	0.564632	0.581461	0.578778	0.569297	0.56324	0.538311	0.598605	0.569532	0.541072	0.540545	0.543628	0.545281	0.563926	0.651828	0.634423	0.645479	0.654476	0.657203	0.645637	0.575254	0.559479	0.610638	0.530686	0.622574	0.530265	0.629621	0.581225	0.643615	0.602065	0.665914	0.751559	0.670303	0.659332	0.629339	0.413716	0.612408	0.592615	0.653064	0.612139	0.634118
BlockNumber	707504	742216	705510	714273	746347	927760	749374	789834	718739	742607	752582	748408	757442	763073	763489	722961	738034	764455	752763	755522	826523	745596	694141	698694	677988	682410	695468	694967	720751	777718	721396	648769	681468	649249	641701	722873	659921	703196	683427	700051	680002	691782	726410	932912	731443	776786	693415	723894	733601
Ploid2_2_Number	43073	47771	41130	42647	47008	65028	45617	49580	43388	45494	46246	44895	45410	48126	48825	43085	47186	51230	47915	49804	54255	47803	43772	44756	42218	41524	43961	44669	43052	50488	43158	40894	39624	39997	38019	43720	38624	40631	41251	44664	39061	41049	44720	64102	43719	47816	41435	43479	44769
Ploid2_3_Number	44063	40703	44584	46687	47729	56907	51141	56667	46881	50272	50344	51922	52398	50520	52580	46061	47413	50814	51132	48636	54526	48358	37862	38131	36910	37861	38230	38619	47303	50880	46391	37319	38874	37425	38742	49447	38780	47601	42348	37921	42746	45020	45938	57677	49535	54775	44426	48340	48287
Ploid2_4_Number	35278	32191	32841	30544	26462	14925	27598	28339	29071	27561	25920	29667	28664	23698	27313	30970	24429	23759	25438	23839	24936	24821	35481	32403	34920	35806	35523	32852	27382	25608	31017	23099	36651	23183	38198	28208	40840	30308	32938	29292	31182	28988	26256	15611	26133	27132	27182	26335	25500
Ploid3_2_Number	60502	70965	57277	58475	69921	106669	63458	68601	60785	64229	66613	61285	62598	70073	68235	61120	70504	76391	67989	74625	82434	71194	64476	68169	62988	60603	63896	66553	60596	76033	61322	62506	57786	59897	52785	58334	53935	54126	54992	62976	51863	53188	62710	96021	57985	62364	55476	58265	60557
Ploid3_3_Number	70052	66357	76318	80575	82689	98224	89729	95620	82454	87168	90204	88870	92369	91795	88613	79117	83376	84954	88408	85156	94091	84744	60889	61657	59159	61371	61570	62566	83295	86870	79043	66971	62513	68118	58173	87438	58085	81808	63148	58440	67928	71575	73227	88000	79807	85608	72884	77583	79665
Ploid3_4_Number	57090	55006	54146	50279	41497	19639	44044	42816	46925	44034	41180	47447	45307	36742	42439	50305	37341	35044	39518	35599	36945	38468	58566	53366	58188	60263	59596	54737	45080	39424	50565	36883	60219	37967	61768	46244	66123	51592	48987	45922	46156	43219	36269	18262	37703	37308	39775	37785	35303
Ploid4_2_Number	60963	76097	57100	57170	69484	118026	61181	65700	60011	61975	64638	59252	59771	68515	67452	61292	70139	77343	67171	74620	82033	70023	67065	70576	65405	63121	66830	69170	59955	76919	60371	63427	58305	60465	56989	56063	58335	52829	57067	70589	53560	53962	65944	111209	58899	63530	56602	58854	62121
Ploid4_3_Number	69963	71515	76638	82331	91084	119713	95140	101439	85613	92004	97527	91501	96024	102313	94157	81645	92750	94723	95592	94897	105446	92794	63159	66811	61088	62458	63563	65536	88545	94750	81517	76873	63942	77937	54513	88695	54623	80292	66766	67412	72910	77992	84719	110992	90033	95579	80781	86797	90965
Ploid4_4_Number	71851	71253	71039	67281	57491	28079	60525	58118	63208	60249	57005	64650	62647	51672	57467	66729	52462	47993	54483	49808	51768	54168	73749	68353	72759	75126	74015	69526	61980	53664	67489	51291	75925	53075	72357	64120	76025	70350	64648	62268	63040	59674	51203	25678	53737	52406	56269	53536	50845
Ploid5_2_Number	35701	45153	32603	32593	37950	68640	33317	35976	33802	34537	35586	32595	32885	37459	37053	34997	37259	41946	36797	40687	45347	38250	38629	40894	38047	36763	38593	39884	33237	42373	34478	35335	33477	33752	35664	31502	36308	30207	34508	43356	32433	32352	37953	70948	33359	36214	33191	34643	35305
Ploid5_3_Number	38281	41385	41034	43949	50931	77096	51327	56096	46253	50176	54029	48614	52097	58424	52231	44338	52786	55198	53478	54453	60592	52264	34703	37604	33856	33279	34419	36144	48490	54006	43705	44387	35152	44893	29606	45876	29324	40724	38535	40959	41469	44534	51735	77586	52514	57028	46778	50588	54606
Ploid5_4_Number	47202	48128	48243	46662	42607	23671	44831	42397	44826	43769	41906	46852	45474	38686	41743	46927	40213	36675	40503	38009	39191	40416	48367	46005	47569	49015	48131	46342	44485	39420	46689	38384	50263	39859	43680	46421	45854	49449	45205	44458	45418	44085	39965	22769	42191	40868	42443	41897	39910
Ploid6_2_Number	20687	23720	18832	19570	21310	44056	20254	22613	19632	20780	20597	20184	20049	21687	22499	19724	21657	24733	22150	23273	26058	22150	20304	21363	19574	19130	20441	20942	19366	24496	20037	19407	18448	18897	19156	18882	19532	18298	26585	29582	24318	25291	28295	61038	26669	29734	25002	27438	27001
Ploid6_3_Number	21758	23216	22020	24159	27667	58015	28587	32925	24488	28018	29113	27471	28643	32529	30543	24046	29265	32683	30602	31369	35809	28981	17891	19408	16933	17043	17733	18688	26063	31271	23684	23389	18784	24093	16095	25459	16447	22479	28569	29287	29535	32504	37947	78499	39129	45274	32948	38620	40263
Ploid6_4_Number	31040	28756	31705	31351	32517	29072	32625	32947	31402	32341	31674	33203	33106	30834	32339	32605	31254	30969	31587	30747	33092	31162	29228	29198	28374	29047	28967	28739	31922	31516	31930	28604	31505	29691	25956	32464	27086	32502	37880	32925	38383	38349	39529	34520	40030	41150	38223	39734	38504
Ploid2_2_Percent	0.0608802	0.0643627	0.0582983	0.0597069	0.0629841	0.0700914	0.0608735	0.0627727	0.0603668	0.0612626	0.0614498	0.0599873	0.0599518	0.0630687	0.0639498	0.0595952	0.0639347	0.0670151	0.0636522	0.06592	0.0656425	0.0641138	0.0630592	0.0640567	0.0622695	0.060849	0.0632107	0.064275	0.0597321	0.0649181	0.0598257	0.0630332	0.0581451	0.061605	0.0592472	0.0604809	0.0585282	0.0577805	0.060359	0.0638011	0.0574425	0.0593381	0.061563	0.0687117	0.0597709	0.0615562	0.059755	0.0600627	0.0610264
Ploid2_3_Percent	0.0622795	0.0548398	0.063194	0.065363	0.0639501	0.0613381	0.068245	0.0717455	0.0652267	0.0676966	0.066895	0.0693766	0.0691776	0.066206	0.0688681	0.0637116	0.0642423	0.0664709	0.0679258	0.064374	0.0659703	0.0648582	0.0545451	0.0545747	0.0544405	0.0554813	0.0549702	0.0555695	0.0656302	0.0654222	0.0643073	0.0575228	0.0570445	0.0576435	0.0603739	0.0684034	0.0587646	0.0676924	0.0619642	0.0541689	0.0628616	0.0650783	0.0632398	0.0618247	0.0677223	0.0705149	0.0640684	0.0667777	0.0658219
Ploid2_4_Percent	0.0498626	0.0433715	0.0465493	0.0427624	0.0354554	0.0160871	0.0368281	0.0358797	0.0404472	0.0371138	0.0344414	0.0396401	0.0378432	0.031056	0.0357739	0.0428377	0.0331001	0.0310797	0.0337928	0.031553	0.0301698	0.0332901	0.051115	0.0463765	0.0515053	0.0524699	0.0510778	0.0472713	0.0379909	0.0329271	0.0429958	0.0356044	0.0537824	0.0357074	0.0595262	0.0390221	0.0618862	0.0431004	0.0481953	0.0418427	0.0458557	0.0419034	0.0361449	0.0167336	0.035728	0.0349285	0.0392002	0.0363796	0.03476
Ploid3_2_Percent	0.0855147	0.0956123	0.0811852	0.0818665	0.0936843	0.114975	0.0846813	0.086855	0.0845717	0.0864912	0.0885126	0.0818872	0.082644	0.09183	0.0893726	0.0845412	0.0955295	0.0999287	0.0903193	0.0987728	0.0997359	0.095486	0.092886	0.0975663	0.0929043	0.0888073	0.0918748	0.0957643	0.0840734	0.0977642	0.0850046	0.0963455	0.0847964	0.0922558	0.0822579	0.0806974	0.0817295	0.0769714	0.0804651	0.0899592	0.0762689	0.0768855	0.0863287	0.102926	0.0792748	0.0802847	0.080004	0.0804883	0.0825476
Ploid3_3_Percent	0.0990129	0.0894039	0.108174	0.112807	0.110792	0.105872	0.119739	0.121063	0.11472	0.117381	0.119859	0.118745	0.121949	0.120296	0.116063	0.109435	0.11297	0.11113	0.117445	0.112711	0.11384	0.113659	0.0877185	0.0882461	0.0872567	0.0899327	0.0885303	0.0900273	0.115567	0.111699	0.10957	0.103228	0.0917328	0.104918	0.0906544	0.120959	0.0880181	0.116337	0.092399	0.0834796	0.0998938	0.103465	0.100807	0.0943283	0.109109	0.110208	0.105109	0.107175	0.108594
Ploid3_4_Percent	0.0806921	0.0741105	0.0767473	0.0703919	0.0556001	0.0211682	0.0587744	0.0542089	0.065288	0.0592965	0.0547183	0.0633972	0.0598158	0.04815	0.0555856	0.0695819	0.0505952	0.0458418	0.0524973	0.0471184	0.0446993	0.0515936	0.0843719	0.0763796	0.0858245	0.0883091	0.0856919	0.078762	0.0625459	0.0506919	0.0700933	0.0568507	0.0883666	0.0584783	0.0962567	0.0639725	0.100198	0.0733679	0.0716785	0.0655981	0.0678763	0.0624749	0.0499291	0.0195753	0.0515461	0.0480287	0.057361	0.0521969	0.0481229
Ploid4_2_Percent	0.0861663	0.102527	0.0809344	0.0800394	0.0930988	0.127216	0.0816428	0.083182	0.0834948	0.083456	0.0858883	0.0791707	0.0789117	0.0897883	0.088347	0.0847791	0.0950349	0.101174	0.0892326	0.0987662	0.0992507	0.0939155	0.0966158	0.101011	0.0964693	0.0924972	0.0960936	0.0995299	0.0831841	0.0989035	0.0836864	0.0977652	0.0855579	0.0931307	0.0888093	0.0775558	0.0883969	0.075127	0.0835012	0.100834	0.0787645	0.0780043	0.0907807	0.119206	0.0805244	0.0817857	0.0816279	0.081302	0.0846795
Ploid4_3_Percent	0.0988871	0.0963534	0.108628	0.115265	0.12204	0.129034	0.126959	0.128431	0.119116	0.123893	0.12959	0.122261	0.126774	0.13408	0.123325	0.112931	0.125672	0.123909	0.126988	0.125605	0.127578	0.124456	0.0909887	0.0956227	0.0901019	0.0915256	0.091396	0.0943009	0.122851	0.121831	0.112999	0.118491	0.0938298	0.120042	0.0849508	0.122698	0.082772	0.114182	0.097693	0.0962958	0.10722	0.112741	0.116627	0.118974	0.12309	0.123044	0.116497	0.119903	0.123998
Ploid4_4_Percent	0.101556	0.0960004	0.100692	0.0941951	0.0770299	0.0302654	0.0807674	0.0735826	0.0879429	0.0811317	0.0757459	0.0863834	0.0827086	0.0677157	0.0752689	0.0922996	0.0710834	0.0627807	0.0723774	0.0659253	0.0626335	0.0726506	0.106245	0.0978297	0.107316	0.110089	0.106425	0.100042	0.0859936	0.0690019	0.0935533	0.079059	0.111414	0.0817483	0.112758	0.0887016	0.115203	0.100043	0.0945939	0.0889478	0.0927056	0.0862613	0.0704877	0.0275246	0.0734671	0.0674652	0.0811477	0.0739556	0.0693088
Ploid5_2_Percent	0.0504605	0.0608354	0.046212	0.045631	0.0508477	0.0739847	0.0444598	0.0455488	0.0470296	0.0465078	0.0472852	0.0435524	0.0434159	0.0490897	0.0485312	0.0484079	0.0504841	0.0548705	0.0488826	0.0538528	0.0548648	0.0513012	0.0556501	0.0585292	0.0561175	0.0538723	0.0554921	0.0573898	0.0461144	0.0544838	0.0477934	0.0544647	0.0491248	0.0519862	0.0555773	0.0435789	0.0550187	0.0429567	0.0504926	0.0619326	0.0476954	0.0467662	0.0522474	0.07605	0.0456071	0.0466203	0.047866	0.0478565	0.0481256
Ploid5_3_Percent	0.0541071	0.0557587	0.0581622	0.0615297	0.0682404	0.0830991	0.0684932	0.0710225	0.064353	0.0675674	0.0717915	0.0649565	0.0687802	0.0765641	0.0684109	0.0613283	0.0715225	0.0722057	0.0710423	0.0720733	0.0733095	0.0700969	0.0499942	0.0538204	0.049936	0.0487669	0.0494904	0.0520082	0.067277	0.0694416	0.0605839	0.0684173	0.0515828	0.069146	0.0461368	0.0634634	0.0444356	0.0579127	0.056385	0.0585086	0.0609836	0.0643758	0.0712201	0.0831654	0.0717951	0.0734153	0.0674603	0.0698832	0.0744356
Ploid5_4_Percent	0.0667162	0.0648437	0.0683803	0.065328	0.0570874	0.0255141	0.0598246	0.0536784	0.0623676	0.0589397	0.055683	0.0626022	0.0600363	0.0506976	0.054674	0.0649094	0.0544866	0.0479754	0.0538058	0.0503083	0.0474167	0.0542063	0.0696789	0.0658443	0.070162	0.0718263	0.0692066	0.0666823	0.0617203	0.0506868	0.0647203	0.0591644	0.0737569	0.0613925	0.0680691	0.0642174	0.0694841	0.0703204	0.0661446	0.0635068	0.066791	0.0637267	0.0550171	0.0244064	0.0576819	0.0526117	0.0612087	0.0578773	0.0544029
Ploid6_2_Percent	0.0292394	0.0319584	0.0266927	0.0273985	0.0285524	0.0474864	0.0270279	0.0286301	0.0273145	0.0279825	0.0273684	0.0269692	0.0264694	0.0284206	0.0294687	0.0272822	0.0293442	0.0323538	0.0294249	0.0308039	0.0315273	0.0297078	0.0292505	0.0305756	0.0288707	0.028033	0.0293917	0.0301338	0.0268692	0.0314973	0.0277753	0.0299136	0.027071	0.0291059	0.0298519	0.0261208	0.0295975	0.0260212	0.0388995	0.0422569	0.0357617	0.0365592	0.0389518	0.0654274	0.0364608	0.0382782	0.0360563	0.0379033	0.0368061
Ploid6_3_Percent	0.0307532	0.0312793	0.0312115	0.0338232	0.0370699	0.0625323	0.0381478	0.041686	0.0340708	0.0377292	0.0386842	0.0367059	0.0378154	0.0426289	0.0400045	0.0332604	0.0396526	0.0427533	0.0406529	0.0415196	0.0433249	0.0388696	0.0257743	0.0277775	0.0249754	0.0249747	0.0254979	0.0268905	0.0361609	0.0402087	0.0328308	0.0360514	0.027564	0.037109	0.0250818	0.0352192	0.0249227	0.0319669	0.0418026	0.0418355	0.0434337	0.0469859	0.0522391	0.0841441	0.0534956	0.0582837	0.0475156	0.0533504	0.0548841
Ploid6_4_Percent	0.0438725	0.0387434	0.0449391	0.0438922	0.0435682	0.0313357	0.0435363	0.0417138	0.0436904	0.0435506	0.0420871	0.0443648	0.0437076	0.0404077	0.0423569	0.0450993	0.0423476	0.0405112	0.0419614	0.0406964	0.0400376	0.0417948	0.0421067	0.0417894	0.0418503	0.0425653	0.0416511	0.041353	0.0442899	0.0405237	0.0442614	0.0440897	0.0462311	0.0457313	0.0404487	0.0449097	0.0410443	0.0462204	0.0554265	0.0470323	0.0564454	0.0554351	0.0544169	0.0370024	0.0547274	0.0529747	0.0551228	0.0548893	0.0524863
Ploid2_2_MeanLength	591.215	578.966	599.307	585.637	564.865	296.557	519.548	491.047	602.958	529.712	555.937	539.349	512.733	514.992	486.313	573.43	569.979	488.939	524.615	497.625	449.511	553.162	636.17	611.824	614.518	635.603	589.335	650.387	555.898	499.016	604.923	555.768	627.968	566.553	643.742	562.456	638.377	589.185	671.766	677.491	648.083	670.489	608.902	311.988	582.05	537.591	667.617	589.554	612.105
Ploid2_3_MeanLength	452.588	484.674	468.134	463.929	424.919	234.661	402.721	348.689	439.26	407.094	404.874	431.815	388.56	396.789	350.591	459.28	407.94	366.628	371.237	393.815	342.777	407.461	510.563	503.317	510.529	527.157	514.852	506.451	421.913	391.017	468.246	450.879	474.727	436.57	504.803	431.976	506.742	447.795	509.699	522.899	536.02	499.143	443.489	238.932	430.747	373.734	486.555	471.024	453.26
Ploid2_4_MeanLength	622.271	716.334	632.598	587.422	569.178	288.293	545.461	532.796	596.074	538.214	612.331	548.597	576.979	572.507	513.669	580.102	578.326	576.439	518.215	564.005	488.292	544.083	662.241	662.501	702.601	674.3	691.723	640.682	568.945	501.567	612.43	650.271	637.376	613.278	674.264	566.946	647.828	599.272	744.09	813.848	721.722	698.443	687.814	300.653	629.412	631.012	686.83	638.193	701.15
Ploid3_2_MeanLength	411.914	456.331	433.372	424.265	419.527	240.733	386.587	354.818	424.236	403.556	401.235	393.995	385.177	388.987	374.803	417.083	404.354	381.917	381.908	380.421	350.29	393.19	465.714	456.916	460.658	460.815	458.283	464.16	403.199	386.034	437.11	424.159	460.225	427.683	471.451	408.172	479.653	426.901	482.764	509.584	495.204	475.322	445.684	257.514	422.062	397.391	476.81	426.848	444.126
Ploid3_3_MeanLength	359.637	410.488	373.823	362.615	341.932	199.692	328.581	293.135	361.479	334.309	329.956	334.578	323.125	320.044	303.707	364.198	333.877	298.491	303.726	309.941	292.459	323.803	398.322	394.987	420.07	423.51	411.79	400.651	353.013	318.086	368.476	360.109	400.756	357.583	422.207	348.021	423.862	365.288	392.241	451.899	409.972	397.149	362.394	208.748	350.097	309.055	389.686	355.297	361.823
Ploid3_4_MeanLength	403.474	524.33	420.655	403.927	390.285	218.554	377.282	347.66	407.497	376.521	378.402	373.47	371.815	376.679	341.976	403.648	382.265	356.31	357.638	354.093	341.043	375.22	467.479	448.294	480.109	479.487	480.098	451.659	397.428	350.649	406.936	397.767	438.148	408.794	470.182	394.008	463.454	416.925	474.467	601.927	478.035	456.113	433.67	225.165	438.248	401.491	482.142	417.596	441.015
Ploid4_2_MeanLength	343.527	361.765	342.706	334.165	328.006	187.294	304.93	282.193	330.348	301.836	308.274	311.539	304.775	306.289	294.412	330.576	315.639	291.403	308.037	292.13	277.099	310.332	360.199	349.137	363.399	366.836	363.733	363.616	324.346	298.869	332.603	332.837	360.982	327.81	381.396	313.546	374.134	338.575	383.485	407.477	397.427	375.117	348.767	202.791	332.792	314.415	373.059	343.115	347.115
Ploid4_3_MeanLength	302.373	327.788	304.716	296.545	282.987	160.162	268.846	241.708	291.021	266.095	273.454	269.89	261.354	262.092	245.555	293.224	273.554	244.206	250.638	251.602	238.535	267.438	336.097	315.83	334.856	337.173	331.559	326.995	283.86	256.342	295.547	285.398	324.873	290.877	349.749	284.513	347.62	303.063	324.978	362.197	339.341	324.465	300.52	171.11	287.734	260.784	319.122	288.917	300.326
Ploid4_4_MeanLength	333.593	414.301	342.115	328.04	305.41	173.337	311.409	277.671	333.793	300.684	307.422	308.408	310.044	297.978	282.907	325.906	297.219	280.55	285.927	286.207	266.777	298.708	379.557	363.673	384.749	386.396	382.874	368.362	320.961	278.522	329.848	326.782	356.535	333.492	392.601	327.109	390.166	349.905	372.849	471.495	383.662	376.658	342.704	179.907	343.765	316.036	379.989	333.382	346.745
Ploid5_2_MeanLength	285.317	308.199	303.469	292.388	272.901	155.269	270.589	246.341	308.314	261.809	264.626	273.366	266.944	270.001	255.194	285.117	267.837	257.243	254.439	256.389	235.925	272.735	314.108	304.935	316.818	322.7	319.82	308.959	283.617	257.501	299.836	286.775	310.502	285.881	328.249	286.352	336.123	307.825	343.896	365.67	349.58	349.789	311.378	170.336	314.985	273.499	341.955	313.448	309.362
Ploid5_3_MeanLength	264.235	282.151	274.118	260.72	248.661	134.285	235.241	214.201	262.155	234.311	240.702	241.128	235.34	226.025	219.099	257.978	241.433	219.146	215.046	222.535	210.356	236.629	286.07	276.083	295.78	307.783	295.447	293.068	256.798	227.819	264.903	248.277	288.364	252.95	310.254	254.348	316.02	268.264	302.285	321.491	305.238	301.176	272.414	145.137	263.969	233.12	293.444	265.459	274.252
Ploid5_4_MeanLength	304.94	349.113	307.537	294.02	274.362	145.748	280.455	253.252	298.407	272.468	283.515	283.953	280.808	263.832	259.456	288.937	264.624	254.79	262.058	259.637	239.845	264.609	333.634	320.292	342.458	338.351	337.983	328.678	290.251	249.752	298.157	287.928	320.859	293.853	354.703	290.409	354.447	309.936	346.886	421.023	356.876	345.631	313.733	163.456	322.545	295.9	343.09	317.87	320.375
Ploid6_2_MeanLength	534.186	518.02	559.677	554.698	472.299	200.961	486.492	434.652	565.04	484.818	492.65	485.035	498.084	445.016	461.718	525.521	487.155	429.076	455.952	443.013	376.254	464.502	573.355	545.186	566.997	586.734	568.174	573.947	496.147	443.295	524.977	485.945	576.438	479.67	615.585	512.143	592.317	576.029	596.297	621.979	591.232	621.11	516.628	210.289	503.355	454.51	591.448	503.361	511.074
Ploid6_3_MeanLength	447.308	436.014	480.653	459.687	391.919	165.085	367.364	318.566	437.445	395.456	383.692	384.351	377.245	355.963	346.464	439.733	384.999	339.03	337.578	340.073	304.835	364.386	504.77	510.33	513.81	550	518.711	510.157	402.31	353.777	440.066	407.463	494.596	397.431	586.928	436.304	569.271	477.504	495.76	504.142	518.264	488.011	420.86	172.138	392.561	346.006	454.543	391.401	397.99
Ploid6_4_MeanLength	589.539	672.114	599.017	569.556	523.522	221.793	532.628	485.394	569.724	522.343	542.357	536.662	512.511	507.182	485.591	571.789	516.022	474.156	490.806	495.34	440.912	519.778	655.789	631.281	679.791	658.994	674.153	648.287	547.732	468.552	564.07	574.879	632.047	567.158	704.675	545.439	697.353	584.014	661.262	811.197	675.466	626.412	565.325	218.063	561.251	503.144	645.338	558.157	571.803
Ploid2_2_GenomeCoverage	0.0546476	0.0593523	0.0528967	0.0535966	0.0569819	0.0413837	0.0508596	0.0522456	0.0561406	0.0517148	0.0551722	0.0519623	0.0499647	0.0531864	0.050954	0.0530184	0.0577155	0.0537525	0.0539426	0.0531847	0.052336	0.056745	0.0597572	0.0587622	0.055674	0.0566376	0.0555969	0.0623445	0.0513581	0.0540658	0.0560249	0.0487723	0.0533969	0.0486282	0.052521	0.0527702	0.052912	0.0513724	0.0594666	0.0649354	0.0543243	0.0590629	0.0584345	0.042917	0.0546073	0.0551627	0.0593628	0.0550077	0.0588062
Ploid2_3_GenomeCoverage	0.0427954	0.0423347	0.0447888	0.0464802	0.043522	0.0286568	0.0441971	0.0424022	0.0441915	0.0439179	0.0437409	0.0481137	0.0436912	0.0430173	0.0395587	0.0453975	0.0415063	0.0399787	0.0407347	0.0411027	0.0401084	0.0422838	0.0414833	0.0411851	0.0404376	0.0428304	0.0422384	0.0419719	0.0428284	0.0426937	0.0466153	0.0361086	0.0396026	0.035062	0.0419686	0.0458374	0.0421711	0.045742	0.0463198	0.0425518	0.0491696	0.0482227	0.0437195	0.0295732	0.0457884	0.0439304	0.0463862	0.0488619	0.0469676
Ploid2_4_GenomeCoverage	0.047109	0.0494847	0.0445825	0.0385031	0.0323215	0.00923354	0.0323044	0.0324016	0.0371861	0.0318325	0.0340598	0.0349259	0.0354909	0.0291147	0.0301074	0.0385537	0.0303179	0.0293901	0.0282887	0.028853	0.0261292	0.0289805	0.0504234	0.0460672	0.0526506	0.0518119	0.0527305	0.0451674	0.0334315	0.0275629	0.040764	0.0322335	0.0501305	0.0305104	0.0552702	0.034319	0.0567762	0.0389764	0.0525948	0.0511579	0.0482941	0.043448	0.0387543	0.010072	0.0352976	0.0367401	0.0400637	0.0360666	0.0383682
Ploid3_2_GenomeCoverage	0.0534807	0.0694935	0.0532674	0.0532387	0.0629488	0.0551054	0.0526446	0.0522344	0.0553381	0.0556232	0.0573559	0.0518161	0.0517418	0.0584933	0.0548821	0.0547049	0.061178	0.0626083	0.0557209	0.0609213	0.0619662	0.0600712	0.0644373	0.0668411	0.0622668	0.0599296	0.0628388	0.0662911	0.0524305	0.0629866	0.0575212	0.0568946	0.0570707	0.0549727	0.0534032	0.0510958	0.055516	0.0495854	0.0569711	0.0688671	0.0551141	0.0542527	0.059977	0.0530625	0.0525185	0.053183	0.0567637	0.0533705	0.0577152
Ploid3_3_GenomeCoverage	0.0540636	0.058453	0.0612228	0.0626998	0.0606747	0.0420919	0.0632697	0.0601501	0.0639609	0.0625353	0.0638708	0.0638076	0.0640496	0.0630448	0.0577528	0.0618341	0.0597376	0.0544172	0.0576228	0.0566389	0.0590519	0.0588857	0.0520467	0.052262	0.0533289	0.055776	0.0544083	0.0537929	0.0631001	0.0592973	0.0625018	0.0517537	0.0537614	0.0522708	0.0527069	0.0653018	0.0528334	0.0641286	0.0531536	0.0566725	0.0597618	0.0610008	0.0569473	0.0394208	0.0599583	0.0567767	0.0609491	0.0591533	0.0618563
Ploid3_4_GenomeCoverage	0.0494306	0.0618921	0.0488779	0.0435823	0.0347551	0.00921081	0.0356594	0.0319434	0.0410345	0.0355793	0.0334395	0.0380263	0.0361503	0.0296999	0.0311444	0.0435747	0.0306317	0.0267955	0.030329	0.0270505	0.0270386	0.0309746	0.0587527	0.051339	0.0599506	0.0620081	0.0613998	0.0530532	0.038447	0.0296656	0.0441567	0.031483	0.0566207	0.0333066	0.0623232	0.0391004	0.0657626	0.0461594	0.0498778	0.0593178	0.0473487	0.0423027	0.0337532	0.00882407	0.0354581	0.0321439	0.0411534	0.0338607	0.0334106
Ploid4_2_GenomeCoverage	0.0449415	0.0590765	0.0419932	0.0409967	0.0489088	0.0474374	0.0400347	0.0397861	0.0425425	0.0401428	0.0427608	0.0396129	0.0390922	0.0450337	0.0426157	0.0434806	0.0475085	0.0483654	0.0444023	0.0467791	0.0487803	0.0466324	0.0518393	0.0528778	0.0510053	0.0496897	0.0521645	0.0539736	0.0417306	0.0493327	0.0430898	0.0453029	0.0451659	0.042535	0.0466431	0.0377223	0.0468357	0.0383838	0.0469627	0.0617249	0.0456792	0.0434385	0.049355	0.0483959	0.0420631	0.042865	0.0453137	0.0433347	0.0462735
Ploid4_3_GenomeCoverage	0.0453975	0.0503049	0.0501141	0.0523931	0.0553133	0.0411455	0.0548892	0.0526158	0.0534668	0.0525369	0.0572308	0.0529947	0.0538554	0.0575447	0.0496161	0.0513747	0.0544474	0.04964	0.0514149	0.0512374	0.0539763	0.0532553	0.0455533	0.0452816	0.0438969	0.045192	0.0452257	0.0459876	0.0539373	0.0521217	0.0517005	0.047081	0.044578	0.048649	0.0409144	0.054153	0.0407474	0.0522186	0.0465618	0.0523965	0.0530938	0.0543048	0.0546355	0.0407555	0.0555921	0.053489	0.0553205	0.0538144	0.0586256
Ploid4_4_GenomeCoverage	0.0514364	0.063349	0.0521543	0.0473631	0.0376794	0.0104446	0.040447	0.0346307	0.0452762	0.0388758	0.037607	0.0427872	0.0416816	0.0330416	0.0348885	0.0466689	0.0334613	0.028894	0.03343	0.0305914	0.0296367	0.0347224	0.0600694	0.0533445	0.0600737	0.0622936	0.0608129	0.0549594	0.0426898	0.0320747	0.0477714	0.0359683	0.0580908	0.0379836	0.0609611	0.0450097	0.0636541	0.0528244	0.051726	0.0630031	0.0519021	0.0482339	0.037656	0.00991357	0.039642	0.0355417	0.0458839	0.0383008	0.0378337
Ploid5_2_GenomeCoverage	0.0218589	0.0298633	0.0212321	0.0204505	0.0222248	0.0228708	0.0193463	0.0190182	0.0223643	0.0194039	0.0202084	0.0191212	0.0188382	0.0217041	0.0202915	0.0214128	0.0214152	0.0231556	0.0200917	0.0223859	0.0229585	0.0223868	0.0260383	0.0267601	0.0258673	0.0254584	0.0264871	0.0264436	0.020229	0.0234147	0.0221844	0.0217453	0.0223065	0.0207064	0.025122	0.0193579	0.0261891	0.0199541	0.0254664	0.0340219	0.0243307	0.0242844	0.0253603	0.0259339	0.0225488	0.0212546	0.0243562	0.0233024	0.0234382
Ploid5_3_GenomeCoverage	0.0217067	0.0250579	0.024138	0.0245891	0.0271775	0.0222167	0.0259107	0.0257853	0.0260207	0.0252295	0.0279079	0.0251553	0.0263105	0.0283379	0.0245577	0.0245459	0.0273486	0.0259584	0.024679	0.026004	0.0273521	0.0265394	0.0213039	0.0222789	0.0214894	0.0219804	0.0218222	0.0227313	0.0267217	0.0264029	0.0248449	0.023649	0.0217526	0.0243687	0.0197114	0.02504	0.0198865	0.0234441	0.0249973	0.0282578	0.0271633	0.0287827	0.0302436	0.0241647	0.0297473	0.0285291	0.0294569	0.0288181	0.0321374
Ploid5_4_GenomeCoverage	0.0308883	0.0360565	0.0318384	0.0294415	0.0250856	0.00740356	0.0269812	0.0230414	0.0287051	0.0255919	0.0254961	0.0285493	0.0274027	0.0219029	0.0232417	0.0290969	0.0228358	0.0200527	0.0227774	0.0211774	0.0201714	0.0229498	0.034629	0.0316207	0.0349584	0.0355891	0.0349092	0.0326863	0.0277082	0.0211274	0.029873	0.0237167	0.0346085	0.0251349	0.0332482	0.0289297	0.0348778	0.0328889	0.0336507	0.0401676	0.0347829	0.0326982	0.0269067	0.00798668	0.0292032	0.0259507	0.0312489	0.0285793	0.0274386
Ploid6_2_GenomeCoverage	0.0237143	0.0263682	0.022618	0.0232953	0.0215984	0.0189993	0.0211449	0.0210921	0.0238048	0.0216194	0.0217752	0.0210088	0.0214297	0.0207107	0.0222926	0.0222436	0.0226405	0.0227736	0.0216727	0.0221253	0.0210398	0.0220791	0.0249819	0.0249935	0.0238167	0.0240866	0.0249232	0.0257935	0.0206191	0.0233028	0.0225732	0.0202379	0.0228204	0.0194516	0.0253054	0.020752	0.0248268	0.0226187	0.0340189	0.0394842	0.0308536	0.0337097	0.0313695	0.0275446	0.0288072	0.0290013	0.031733	0.0296382	0.0296131
Ploid6_3_GenomeCoverage	0.0208855	0.0217224	0.0227127	0.0238321	0.023269	0.0205526	0.0225365	0.0225085	0.0229878	0.0237769	0.0239712	0.0226581	0.0231879	0.0248482	0.0227086	0.0226909	0.0241784	0.0237782	0.0221689	0.0228925	0.0234249	0.0226619	0.0193798	0.0212546	0.0186705	0.0201154	0.0197391	0.0204591	0.0225012	0.0237406	0.0223663	0.0204513	0.019937	0.0205482	0.020272	0.023837	0.0200921	0.0230343	0.0303939	0.0316846	0.0328479	0.0340398	0.0342717	0.0289976	0.032963	0.0336165	0.0321384	0.032438	0.0343873
Ploid6_4_GenomeCoverage	0.0392694	0.0414755	0.0407556	0.0383185	0.0365313	0.013837	0.0372902	0.0343187	0.0383921	0.0362518	0.0368645	0.0382383	0.0364108	0.0335594	0.033699	0.0400074	0.0346094	0.0315115	0.0332689	0.0326834	0.0313109	0.0347587	0.0411324	0.0395545	0.041392	0.0410774	0.0419066	0.0399815	0.0375214	0.0316891	0.0386502	0.0352877	0.0427316	0.0361368	0.0392507	0.0379987	0.0405338	0.0407337	0.0537532	0.0573155	0.0556369	0.0515506	0.047955	0.0161538	0.0482129	0.0444307	0.0529337	0.0475926	0.0472468
Note: The genome coverage is not accurate because duplicated blocks are not removed
[truncated: 65 more columns]

## Sheet: Table 5
Supplementary Table 5 Summary of final syntenic haplotype blocks used for HPA between sweet potato and tetraploid accessions
Accession	CIP403270	PI518474	CH71.3	CH80.3	CH81.2	DFA7480	ECAL_2145(1)_1	ECAL_2156(10)_2	ECAL_2156(1)_1	ECAL_2156(5)_1	ECAL_2192_2	ECAL_2232(3)_2	ECAL_2262_1	ECAL_2293(2)_1	K233_1	K233ox	K300_1	K300_5	K300_6	K500_1	K500_2	K500_4	PI561246	PI561247	PI561248	PI561255	PI561258	PI561261	PI518479	PI518474ox	PI518479ox	PI561246ox	PI561248ox	PI561255ox	CIP695141	CIP695141B	CIP695150	CIP695150B	CIP403270	PI518474	CH71.3	CH80.3	CH81.2	DFA7480	ECAL_2145(1)_1	ECAL_2156(10)_2	ECAL_2156(1)_1	ECAL_2156(5)_1	ECAL_2192_2
Reference	Huarmeyano	Huarmeyano	Huarmeyano	Huarmeyano	Huarmeyano	Huarmeyano	Huarmeyano	Huarmeyano	Huarmeyano	Huarmeyano	Huarmeyano	Huarmeyano	Huarmeyano	Huarmeyano	Huarmeyano	Huarmeyano	Huarmeyano	Huarmeyano	Huarmeyano	Huarmeyano	Huarmeyano	Huarmeyano	Huarmeyano	Huarmeyano	Huarmeyano	Huarmeyano	Huarmeyano	Huarmeyano	Huarmeyano	Huarmeyano	Huarmeyano	Huarmeyano	Huarmeyano	Huarmeyano	Huarmeyano	Huarmeyano	Huarmeyano	Huarmeyano	NK259L	NK259L	NK259L	NK259L	NK259L	NK259L	NK259L	NK259L	NK259L	NK259L	NK259L
MeanLength	316.717	385.088	328.257	316.658	299.979	179.126	291.493	261.607	316.78	290.17	292.149	293.21	287.471	280.55	267.651	313.947	291.848	264.875	272.592	275.259	258.436	287.293	364.454	347.834	374.244	373.97	368.45	356.11	308.978	274.498	315.071	319.59	346.489	320.903	375.594	306.684	372.82	327.498	342.141	428.686	356.151	340.496	318.323	185.356	310.916	276.607	343.591	310.451	312.005
GenomeCoverage	0.341979	0.383851	0.357215	0.352038	0.349129	0.281605	0.347201	0.330366	0.355611	0.342584	0.348463	0.346863	0.346046	0.342653	0.327088	0.353528	0.340547	0.323502	0.329974	0.333949	0.34252	0.341233	0.370869	0.357037	0.372556	0.375964	0.373999	0.36273	0.351933	0.338538	0.352579	0.331242	0.358168	0.333312	0.361354	0.349673	0.367304	0.360979	0.34983	0.391487	0.366576	0.360108	0.3564	0.290983	0.355311	0.338811	0.365437	0.351766	0.357496
BlockNumber	503161	464497	507102	518059	542344	732592	555051	588472	523116	550166	555817	551263	560943	569148	569475	524743	543751	569136	564087	565352	617608	553485	474196	478323	463892	468478	473011	474657	530777	574710	521468	482983	481701	484013	448326	531314	459098	513633	476465	425557	479634	492834	521735	731547	532531	570787	495622	528009	533935
Ploid2_2_Number	22428	18794	21673	22690	25795	39131	25527	28279	23458	25189	25771	24801	25392	27527	27602	23280	26363	29058	27180	28399	30981	26671	20352	21314	19364	19149	20308	21127	23695	28305	23065	22539	19876	22052	18396	24207	18664	22000	20237	16757	19367	20626	23242	35811	22510	25446	21060	22819	23573
Ploid2_3_Number	26332	21675	26608	28123	28691	34106	31240	34597	28455	30884	30834	31693	31887	30854	32494	27670	28784	30843	31357	29758	33130	29661	22045	22149	21509	21855	22065	22436	28748	30973	27991	22858	23020	22907	23098	29796	22799	28791	23680	18907	23706	25304	25624	32078	27956	31211	24810	27386	27381
Ploid2_4_Number	21886	22730	20191	18593	15538	7336	16366	16429	17447	16392	15242	17750	16990	13713	16126	18833	14355	13620	14823	13769	14148	14653	23738	21154	23476	23979	23660	21613	16468	14989	18830	14269	23235	14204	24980	16855	26572	18523	18699	19076	17848	16089	14125	7233	14239	14264	14920	14277	13646
Ploid3_2_Number	35953	29968	34301	35736	44314	78400	40823	45259	37745	41315	42908	39221	40418	46010	45098	37721	45696	51008	45213	50029	55369	46610	33646	36631	32645	31570	32874	35091	38195	49560	37458	40263	33075	38550	28962	36921	29803	33358	31945	26456	30621	32118	39183	68570	36736	40350	33935	37021	38386
Ploid3_3_Number	50102	40484	55150	59076	61135	75950	67495	72023	60825	65536	67767	66193	69077	69499	67203	57724	62290	64074	67311	64734	71438	63797	41698	43254	40372	41401	41841	43300	62210	65057	57798	50709	43878	51600	39958	64860	39616	59669	44065	34821	47642	50878	52470	65711	58068	62633	52366	56428	58146
Ploid3_4_Number	43495	45811	41464	38667	31131	14226	33491	32352	35852	33501	31214	36164	34474	27713	32034	38582	27959	26139	30030	26876	27482	29107	46464	41823	46441	47945	47239	43269	34708	29664	38653	28448	46419	29367	48421	35387	51268	40003	35617	36610	33797	31541	26001	12640	27066	26601	28713	27415	25327
Ploid4_2_Number	37880	33115	35371	36059	45336	93473	40993	45464	38528	41727	43133	39029	39842	46835	46696	39403	47228	54572	46696	52200	58003	47946	35802	38907	35170	34199	35557	37389	39063	52713	37961	42330	34640	40214	33739	36650	34683	33553	35451	30291	33391	34089	43505	87930	39388	44008	36506	39684	41712
Ploid4_3_Number	53714	45749	59328	64559	72507	102208	76914	83112	67863	74409	79109	73297	77434	83740	77047	64203	75178	77614	78715	78210	86555	75747	45735	49454	44294	44899	45624	47988	71079	77120	63921	63168	48291	63904	39869	70875	39557	62616	50588	42320	56071	60976	67133	93999	72196	77483	63326	69814	73110
Ploid4_4_Number	60808	63507	60885	58012	48967	24199	52091	49717	54366	51991	48891	55637	53853	44511	49344	57184	44895	40889	46920	42906	44317	46572	63769	58795	63183	65032	64097	60343	53422	45835	57798	44620	64739	46183	62075	55276	64679	61076	53537	53984	52650	50098	42683	21664	45104	43842	47128	45024	42500
Ploid5_2_Number	22738	20319	20647	20912	24681	56021	22170	25023	21909	23368	23833	21727	22247	25487	25726	22648	25161	29822	25782	28567	32113	26362	21665	23120	21541	21283	21868	22512	21825	29188	22081	23640	20611	22544	22105	20876	22773	19657	22011	19388	20825	20872	25388	58273	22649	25576	21573	23722	23987
Ploid5_3_Number	30188	27465	32682	35512	41606	68125	42442	46999	37410	41601	44804	39757	42774	49100	43812	35675	43955	46545	45191	46116	50863	43682	26238	28796	25524	24848	25647	27414	39745	45187	35107	37582	27367	37815	22758	37398	22199	32497	30163	26760	32808	35810	42348	68577	43453	47817	37984	41872	45271
Ploid5_4_Number	41903	44259	43279	42000	38159	21554	40370	38085	40423	39583	37564	42155	41058	35103	37651	42185	36252	33021	36562	34438	35263	36448	43612	41380	42922	44156	43453	41945	40272	35605	41873	34928	44927	36242	39141	41865	40692	44759	39579	39995	40072	39092	35365	20573	37641	36219	37582	37265	35420
Ploid6_2_Number	12481	10185	11272	11807	13657	37429	13073	15160	11989	13496	13171	12865	13051	14554	14919	12248	14144	17051	14831	15845	18332	14671	10738	11597	10305	10482	10862	11308	12301	16680	12340	12486	10485	12000	10935	11763	11125	11123	16605	12590	14920	16101	18963	53207	18070	21077	16103	18577	18257
Ploid6_3_Number	16170	14808	16356	18475	21824	53041	22804	26672	18910	22210	23246	21419	22904	26788	24757	18469	23443	26908	25080	25746	29706	23518	12830	14043	12070	12077	12450	13439	20436	25426	18227	19076	13648	19508	11402	19693	11436	17035	21568	18497	22389	25291	30500	72563	31775	37532	25945	31234	32788
Ploid6_4_Number	27083	25628	27895	27838	29003	27393	29252	29301	27936	28964	28330	29555	29542	27714	28966	28918	28048	27972	28396	27759	29908	28040	25864	25906	25076	25603	25466	25483	28610	28408	28365	26067	27490	26923	22487	28892	23232	28973	32720	29105	33527	33949	35205	32718	35680	36728	33671	35471	34431
Ploid2_2_Percent	0.0445742	0.040461	0.0427389	0.0437981	0.0475621	0.0534145	0.0459904	0.048055	0.0448428	0.0457844	0.046366	0.0449894	0.0452666	0.0483653	0.0484692	0.0443646	0.0484836	0.0510563	0.0481841	0.0502324	0.0501629	0.0481874	0.042919	0.0445598	0.0417425	0.0408749	0.0429335	0.04451	0.0446421	0.0492509	0.0442309	0.0466662	0.0412621	0.0455608	0.0410326	0.0455606	0.0406536	0.0428321	0.0424732	0.0393766	0.0403787	0.0418518	0.0445475	0.0489524	0.0422698	0.0445806	0.0424921	0.0432171	0.0441496
Ploid2_3_Percent	0.0523331	0.0466634	0.0524707	0.0542853	0.0529018	0.0465552	0.0562831	0.0587912	0.0543952	0.0561358	0.0554751	0.0574916	0.0568453	0.0542109	0.0570596	0.0527306	0.052936	0.0541927	0.0555889	0.0526362	0.0536424	0.0535895	0.0464892	0.0463055	0.0463664	0.0466511	0.046648	0.0472678	0.0541621	0.0538933	0.0536773	0.0473267	0.047789	0.0473272	0.0515205	0.0560798	0.0496604	0.0560536	0.0496993	0.0444288	0.0494252	0.0513439	0.0491131	0.0438495	0.0524965	0.0546806	0.0500583	0.0518665	0.0512815
Ploid2_4_Percent	0.043497	0.0489347	0.0398164	0.0358897	0.0286497	0.0100138	0.0294856	0.0279181	0.0333521	0.0297946	0.0274227	0.0321988	0.0302883	0.0240939	0.0283173	0.0358899	0.0264	0.023931	0.0262779	0.0243547	0.0229077	0.0264741	0.0500595	0.0442253	0.0506066	0.0511849	0.05002	0.0455339	0.0310262	0.026081	0.0361096	0.0295435	0.0482353	0.0293463	0.0557184	0.0317232	0.0578787	0.0360627	0.0392453	0.044826	0.0372117	0.0326459	0.0270731	0.00988727	0.0267383	0.0249901	0.0301036	0.0270393	0.0255574
Ploid3_2_Percent	0.0714543	0.0645171	0.0676412	0.0689806	0.0817083	0.107017	0.0735482	0.0769094	0.0721542	0.0750955	0.0771981	0.0711475	0.0720537	0.0808401	0.0791922	0.0718847	0.0840385	0.0896236	0.0801525	0.0884918	0.0896507	0.0842119	0.0709538	0.0765821	0.070372	0.0673884	0.0694994	0.0739292	0.0719605	0.0862348	0.0718318	0.0833632	0.0686629	0.0796466	0.0646003	0.06949	0.0649164	0.0649452	0.0670458	0.0621679	0.0638424	0.06517	0.0751013	0.0937329	0.0689838	0.0706919	0.0684695	0.0701143	0.0718926
Ploid3_3_Percent	0.0995745	0.0871566	0.108755	0.114033	0.112724	0.103673	0.121601	0.12239	0.116274	0.11912	0.121923	0.120075	0.123144	0.122111	0.118009	0.110004	0.114556	0.112581	0.119327	0.114502	0.115669	0.115264	0.0879341	0.0904284	0.0870289	0.0883734	0.0884567	0.0912238	0.117206	0.1132	0.110837	0.104991	0.0910897	0.106609	0.0891271	0.122075	0.0862909	0.11617	0.0924832	0.0818245	0.0993299	0.103236	0.100568	0.0898247	0.109042	0.109731	0.105657	0.106869	0.108901
Ploid3_4_Percent	0.0864435	0.098625	0.0817666	0.0746382	0.0574008	0.0194187	0.0603386	0.0549763	0.0685355	0.0608925	0.0561588	0.0656021	0.0614572	0.0486921	0.0562518	0.0735255	0.0514188	0.0459275	0.0532365	0.0475385	0.0444975	0.0525886	0.0979848	0.0874367	0.100112	0.102342	0.0998687	0.0911585	0.0653909	0.0516156	0.0741234	0.0589006	0.0963648	0.060674	0.108004	0.0666028	0.111671	0.0778825	0.0747526	0.0860284	0.0704641	0.0639992	0.0498356	0.0172785	0.0508252	0.0466041	0.0579333	0.0519215	0.0474346
Ploid4_2_Percent	0.0752841	0.0712922	0.0697513	0.069604	0.0835927	0.127592	0.0738545	0.0772577	0.073651	0.0758444	0.0776029	0.0707992	0.0710268	0.0822897	0.0819983	0.0750901	0.0868559	0.0958857	0.0827816	0.0923319	0.0939156	0.0866257	0.0755004	0.0813404	0.0758151	0.0730002	0.0751716	0.0787706	0.0735959	0.091721	0.0727964	0.0876428	0.0719118	0.0830845	0.0752555	0.0689799	0.075546	0.0653249	0.0744042	0.0711797	0.0696177	0.0691693	0.0833852	0.120197	0.0739638	0.0771006	0.0736569	0.0751578	0.0781219
Ploid4_3_Percent	0.106753	0.0984915	0.116994	0.124617	0.133692	0.139516	0.138571	0.141234	0.129728	0.135248	0.142329	0.132962	0.138043	0.147132	0.135295	0.122351	0.138258	0.136372	0.139544	0.138339	0.140146	0.136855	0.0964475	0.10339	0.0954834	0.0958401	0.0964544	0.1011	0.133915	0.134189	0.122579	0.130787	0.100251	0.13203	0.0889286	0.133396	0.0861624	0.121908	0.106174	0.0994461	0.116904	0.123725	0.128673	0.128493	0.135571	0.135748	0.127771	0.132221	0.136927
Ploid4_4_Percent	0.120852	0.136722	0.120065	0.11198	0.0902877	0.033032	0.093849	0.0844849	0.103927	0.0945006	0.0879624	0.100926	0.0960044	0.0782064	0.0866482	0.108975	0.0825654	0.071844	0.0831787	0.0758925	0.0717559	0.0841432	0.134478	0.122919	0.136202	0.138815	0.135508	0.12713	0.100649	0.0797533	0.110837	0.0923842	0.134397	0.0954169	0.13846	0.104036	0.140883	0.11891	0.112363	0.126855	0.109771	0.101653	0.0818097	0.029614	0.0846974	0.0768097	0.0950886	0.0852713	0.0795977
Ploid5_2_Percent	0.0451903	0.0437441	0.0407157	0.0403661	0.045508	0.0764696	0.0399423	0.042522	0.0418817	0.0424745	0.0428792	0.0394131	0.03966	0.044781	0.0451749	0.0431602	0.046273	0.0523987	0.0457057	0.0505296	0.0519958	0.0476291	0.0456879	0.0483355	0.0464354	0.0454301	0.0462315	0.0474279	0.041119	0.0507874	0.0423439	0.0489458	0.042788	0.0465773	0.0493056	0.0392913	0.0496038	0.0382705	0.0461965	0.0455591	0.0434185	0.042351	0.0486607	0.0796572	0.0425309	0.0448083	0.0435271	0.0449273	0.0449249
Ploid5_3_Percent	0.0599967	0.0591285	0.0644486	0.0685482	0.0767151	0.0929917	0.076465	0.0798662	0.0715138	0.0756154	0.0806093	0.0721198	0.0762537	0.0862693	0.076934	0.0679857	0.0808366	0.0817819	0.0801135	0.0815704	0.0823548	0.0789217	0.0553316	0.060202	0.0550214	0.0530398	0.0542207	0.0577554	0.0748808	0.0786257	0.0673234	0.0778123	0.0568133	0.0781281	0.0507622	0.0703878	0.0483535	0.0632689	0.0633058	0.0628823	0.0684022	0.0726614	0.0811676	0.0937424	0.0815971	0.0837738	0.0766391	0.0793017	0.0847875
Ploid5_4_Percent	0.0832795	0.0952837	0.0853457	0.0810718	0.0703594	0.0294216	0.0727321	0.0647185	0.0772735	0.0719474	0.0675834	0.0764699	0.0731946	0.0616764	0.0661153	0.0803917	0.0666702	0.0580195	0.0648162	0.0609143	0.0570961	0.0658518	0.0919704	0.0865106	0.0925258	0.0942542	0.0918647	0.0883691	0.0758737	0.061953	0.0802983	0.0723172	0.0932674	0.0748782	0.0873048	0.0787952	0.0886347	0.087142	0.083068	0.0939827	0.083547	0.0793208	0.0677835	0.0281226	0.0706832	0.0634545	0.0758279	0.0705764	0.0663377
Ploid6_2_Percent	0.0248052	0.0219269	0.0222283	0.0227908	0.0251814	0.0510912	0.0235528	0.0257616	0.0229184	0.0245308	0.0236966	0.0233373	0.0232662	0.0255716	0.0261978	0.0233409	0.0260119	0.0299594	0.026292	0.0280268	0.0296823	0.0265066	0.0226446	0.0242451	0.0222142	0.0223746	0.0229635	0.0238235	0.0231755	0.0290233	0.023664	0.0258518	0.0217666	0.0247927	0.0243907	0.0221395	0.0242323	0.0216555	0.0348504	0.0295848	0.0311071	0.0326702	0.036346	0.0727322	0.0339323	0.0369262	0.0324905	0.0351831	0.0341933
Ploid6_3_Percent	0.0321368	0.0318796	0.0322539	0.035662	0.0402401	0.0724018	0.0410845	0.0453242	0.0361488	0.0403696	0.0418231	0.0388544	0.0408312	0.0470668	0.0434734	0.0351963	0.0431135	0.0472787	0.0444612	0.0455398	0.0480985	0.0424908	0.0270563	0.0293588	0.026019	0.0257792	0.0263207	0.0283131	0.038502	0.0442414	0.0349532	0.0394962	0.0283329	0.0403047	0.0254324	0.0370647	0.0249097	0.0331657	0.0452667	0.0434654	0.0466793	0.0513175	0.0584588	0.0991912	0.0596679	0.0657548	0.0523484	0.0591543	0.0614082
Ploid6_4_Percent	0.0538257	0.0551737	0.0550087	0.0537352	0.0534771	0.0373919	0.0527015	0.0497917	0.0534031	0.0526459	0.05097	0.0536132	0.0526649	0.0486938	0.0508644	0.0551089	0.0515824	0.0491482	0.0503398	0.0491004	0.0484255	0.0506608	0.0545428	0.0541601	0.0540557	0.0546514	0.0538381	0.0536872	0.0539021	0.0494301	0.0543945	0.0539708	0.0570686	0.0556245	0.0501577	0.0543784	0.0506036	0.056408	0.0686724	0.0683927	0.0699012	0.0688853	0.0674768	0.0447244	0.0670008	0.0643462	0.0679369	0.0671788	0.0644854
Ploid2_2_MeanLength	354.068	409.678	371.776	365.932	364.47	266.196	350.251	306.989	369.578	341.833	349.095	341.645	331.865	341.474	321.722	370.08	355.361	316.02	333.788	343.683	321.325	352.021	392.126	384.612	401.577	399.679	392.523	389.464	374.787	336.645	363.361	392.51	373.227	399.941	377.103	361.294	379.468	369.876	351.975	446.985	390.847	368.196	371.626	268.908	362.609	310.695	384.85	354.047	356.702
Ploid2_3_MeanLength	304.061	390.625	327.58	319.331	308.613	216.249	294.57	252.517	314.955	294.053	297.095	296.079	287.867	294.634	262.285	319.228	301.572	271.593	279.122	283.936	270.215	298.04	359.905	351.601	368.607	362.632	368.696	347.247	312.831	282.959	322.447	328.965	343.839	336.625	348.238	311.766	347.56	327.706	318.167	405.356	334.742	321.987	320.811	212.192	299.916	266.568	332.523	303.623	306.361
Ploid2_4_MeanLength	358.645	489.298	368.966	361.373	338.138	208.746	336.109	300.979	354.007	329.04	333.633	327.93	339.481	321.433	301.194	356.437	332.983	301.526	309.447	313.049	284.752	325.596	427.66	414.765	446.2	439.972	431.148	419.908	357.42	307.242	352.354	390.416	394.321	378.219	411.234	338.246	402.941	370.372	373.895	509.556	384.105	365.211	352.892	203.505	342.069	302.344	374.824	346.13	350.94
Ploid3_2_MeanLength	334.233	382.447	342.727	332.594	344.392	224.295	317.047	289.684	338.93	317.373	321.894	317.115	314.504	316.937	300.771	334.38	334.485	312.214	304.7	313.646	297.683	323.711	372.753	368.116	379.267	373.175	372.75	368.911	330.568	316.901	339.024	359.723	358.365	356.934	379.75	321.959	369.821	341.552	345.523	404.41	361.306	350.619	353.46	235.74	326.263	304.949	353.549	325.543	333.568
Ploid3_3_MeanLength	308.688	378.632	323.561	311.495	301.247	189.012	291.148	262.753	316.926	291.685	294.08	293.823	287.17	283.621	267.31	315.376	295.656	263.828	271.244	272.822	260.502	286.369	352.826	338.541	363.245	364.138	357.568	344.22	310.869	277.757	317.133	316.743	342.681	321.772	361.906	306.74	359.907	318.255	317.43	393.747	336.955	326.526	305.387	193.483	300.279	266.86	331.097	301.678	302.048
Ploid3_4_MeanLength	333.968	451.044	346.341	335.431	303.394	180.492	303.266	274.694	334.844	305.405	302.026	305.073	301.311	292.323	269.686	331.349	296.558	270.216	284.427	282.297	262.5	297.979	392.713	370.511	402.999	405.043	398.79	384.434	326.397	279.793	329.491	330.428	361.169	343.23	397.074	321.385	390.98	352.174	353.804	490.601	366.002	350.927	318.009	184.301	326.343	287.061	354.181	324.712	325.168
Ploid4_2_MeanLength	285.112	320.084	289.103	282.579	279.075	180.026	261.757	241.903	282.21	261.803	265.042	262.232	259.32	258.773	248.64	281.074	270.758	254.722	252.012	260.493	247.22	266.178	316.136	304.885	317.801	321.835	318.272	312.634	276.382	261.161	280.325	295.181	308.229	288.634	333.406	269.597	333.233	287.047	302.178	347.755	312.33	298.941	296.909	192.05	281.526	255.924	302.651	279.351	281.884
Ploid4_3_MeanLength	265.758	309.518	280.018	270.808	259.044	155.004	250.407	227.417	271.267	247.549	251.5	250.359	244.466	242.423	228.923	267.341	251.421	227.465	232.355	236.054	224.146	246.083	305.383	289.471	312.597	313.362	305.893	296.134	264.698	235.357	269.984	268.709	294.77	271.001	318.077	260.758	312.416	274.436	282.611	332.725	298.154	289.073	274.097	164.343	262.341	237.347	288.649	261.692	268.071
Ploid4_4_MeanLength	297.665	377.997	307.853	297.801	272.085	156.953	279.009	247.433	298.247	275.791	277.738	281.459	278.686	263.179	254.043	295.109	267.694	241.036	258.906	254.804	238.919	266.211	344.311	327.102	351.915	352.308	345.815	336.516	292.221	251.384	296.202	297.575	321.564	303.2	355.322	297.142	352.966	319.477	323.693	424.802	331.339	325.38	291.129	166.763	303.557	268.479	328.96	303.876	298.355
Ploid5_2_MeanLength	252.59	284.348	264.427	255.584	244.579	151.445	233.794	219.657	254.947	234.452	233.44	235.393	228.894	230.048	219.121	249.49	236.595	223.445	221.247	224.808	215.547	233.605	284.717	269.657	293.849	293.691	291.1	276.803	244.027	226.756	254.357	254.698	275.093	249.341	306.93	246.07	305.722	262.577	276.536	316.078	287.478	278.723	264.271	162.954	252.656	231.461	276.465	250.235	256.506
Ploid5_3_MeanLength	241.846	269.403	253.943	245.616	232.912	131.167	222.542	202.595	244.217	222.962	226.033	225.251	220.629	215.912	206.328	240.815	225.342	203.465	207.074	210.743	199.303	220.44	272.802	260.586	279.225	285.963	275.756	267.557	236.523	210.567	242.701	238.786	268.468	238.73	293.307	235.398	289.641	249.208	261.62	297.312	273.336	263.545	249.338	140.283	241.027	217.901	265.809	238.432	244.018
Ploid5_4_MeanLength	279.827	330.157	286.281	279.145	254.114	141.222	264.392	234.303	279.665	259.402	258.152	263.293	260.985	245.989	242.548	274.007	249.008	229.786	244.862	238.679	225.677	250.094	313.521	300.066	319.129	320.324	315.032	307.945	274.486	235.237	274.082	270.882	296.972	273.536	326.876	276.24	326.571	293.876	308.742	382.808	319.501	309.306	275.219	149.018	288.216	256.828	307.382	286.196	281.902
Ploid6_2_MeanLength	377.72	444.332	396.785	371.152	333.446	175.54	323.319	280.939	364.671	321.984	324.877	325.061	321.796	306.556	297.37	354.4	320.865	285.22	301.158	300.419	277.298	316.249	456.29	406.504	482.875	485.792	464.63	434.218	350.227	302.369	358.179	361.356	421.078	352.26	483.907	358.674	488.62	382.025	395.08	500.874	411.038	391.271	355.96	186.055	341.695	295.515	388.409	338.197	342.238
Ploid6_3_MeanLength	356.331	398.422	369.883	352.515	315.567	152.436	297.745	259.858	349.238	301.493	301.196	308.185	296.875	282.139	273.943	337.049	302.661	260.903	276.087	276.678	255.634	295.98	436.153	413.061	456.192	453.731	456.944	428.431	324.532	280.535	340.941	339.214	412.063	332.862	486.632	325.436	475.983	356.756	380.14	452.535	393.334	364.56	330.273	159.753	315.909	275.958	363.683	316.545	321.48
Ploid6_4_MeanLength	558.762	669.261	574.35	544.315	497.751	211.991	497.626	454.997	548.774	495.445	508.129	502.204	488.5	473.687	455.092	535.907	486.516	435.226	463.706	465.534	412.841	487.8	638.691	614.33	668.87	653.509	652.58	631.56	524.362	445.58	536.816	548.14	604.827	548.404	683.414	523.815	680.864	560.576	624.916	809.717	646.85	596.859	526.254	209.625	530.346	463.929	614.908	530.471	534.155
Ploid2_2_GenomeCoverage	0.0170411	0.0165227	0.017291	0.0178179	0.0201752	0.0223534	0.0191867	0.0186298	0.0186045	0.0184776	0.0193061	0.018183	0.0180833	0.0201715	0.0190564	0.0184884	0.0201041	0.0197061	0.0194688	0.0209451	0.0213629	0.0201478	0.0171259	0.0175917	0.0166872	0.0164239	0.0171062	0.0176573	0.0190573	0.0204482	0.0179851	0.0189848	0.0159193	0.0189262	0.0148869	0.0187682	0.0151985	0.0174622	0.0152855	0.0160735	0.0162439	0.0162972	0.0185353	0.0206652	0.017516	0.0169658	0.0173928	0.0173371	0.0180443
Ploid2_3_GenomeCoverage	0.0171816	0.0181694	0.0187047	0.0192718	0.0190012	0.0158272	0.0197479	0.0187478	0.0192321	0.0194885	0.0196583	0.0201368	0.0196982	0.0195081	0.0182893	0.0189553	0.0186278	0.0179761	0.0187823	0.0181319	0.0192111	0.0189706	0.0170262	0.0167118	0.0170139	0.0170074	0.0174579	0.0167188	0.0192991	0.0188073	0.0193685	0.0161364	0.0169856	0.0165476	0.0172612	0.0199346	0.0170046	0.020247	0.016168	0.0164467	0.017029	0.0174843	0.0176407	0.0146069	0.0179926	0.017854	0.0177039	0.0178436	0.0180013
Ploid2_4_GenomeCoverage	0.0168442	0.0238667	0.0159869	0.0144187	0.0112748	0.00328622	0.0118044	0.0106113	0.0132542	0.0115745	0.0109127	0.0124911	0.0123774	0.00945895	0.010423	0.0144053	0.0102576	0.00881297	0.00984335	0.00924986	0.00864536	0.0102383	0.0217853	0.0188285	0.0224789	0.02264	0.0218908	0.0194756	0.0126311	0.00988265	0.014238	0.0119548	0.0196613	0.0115285	0.0220446	0.0122344	0.0229766	0.0147221	0.0150033	0.0208593	0.0147116	0.0126094	0.0106967	0.00315873	0.0104523	0.00925473	0.012001	0.0106047	0.0102768
Ploid3_2_GenomeCoverage	0.0257873	0.0245952	0.0252276	0.0255059	0.0327503	0.037736	0.0277747	0.0281351	0.027453	0.0281383	0.0296395	0.0266905	0.0272786	0.0312929	0.029108	0.0270673	0.0328001	0.0341751	0.0295635	0.033673	0.0353704	0.0323785	0.0269138	0.028937	0.0265694	0.0252818	0.0262961	0.0277804	0.0270949	0.0337035	0.0272518	0.031081	0.0254358	0.0295279	0.0236019	0.0255091	0.0236522	0.0244499	0.0236864	0.0229597	0.0237418	0.024166	0.0297206	0.0346886	0.0257205	0.0264053	0.0257465	0.0258629	0.0274775
Ploid3_3_GenomeCoverage	0.0331891	0.0328943	0.0382932	0.0394895	0.0395215	0.0308062	0.0421703	0.0406105	0.0413676	0.0410218	0.0427665	0.0417367	0.0425689	0.0422996	0.03855	0.0390666	0.0395207	0.0362763	0.0391802	0.0378993	0.0399356	0.0392054	0.0315716	0.0314237	0.0314702	0.0323517	0.0321056	0.0319849	0.041501	0.0387775	0.0393345	0.0344677	0.0322669	0.0356302	0.0310327	0.0426941	0.0305972	0.0407516	0.0300166	0.0294225	0.0344494	0.0356508	0.034386	0.0272835	0.0374182	0.035868	0.037207	0.0365307	0.0376892
Ploid3_4_GenomeCoverage	0.031172	0.0443414	0.0308174	0.0278333	0.0202684	0.00551013	0.0217958	0.0190709	0.0257618	0.021956	0.0202308	0.0236756	0.0222909	0.0173847	0.0185392	0.0274341	0.0177931	0.0151572	0.0183293	0.0162814	0.015481	0.0186125	0.0391572	0.0332534	0.040163	0.0416739	0.0404265	0.0356959	0.0243106	0.0178109	0.0273305	0.020172	0.0359772	0.0216304	0.0412596	0.0244056	0.0430151	0.0302322	0.0270421	0.0385433	0.0265449	0.0237527	0.0177439	0.00499913	0.0189548	0.0163867	0.0218235	0.0191032	0.0176731
Ploid4_2_GenomeCoverage	0.0231764	0.0227462	0.0219442	0.0218663	0.0271509	0.0361112	0.0230266	0.023601	0.023333	0.023443	0.0245327	0.0219631	0.0221716	0.0260081	0.0249155	0.0237668	0.0274411	0.0298302	0.0252535	0.0291801	0.0307719	0.027387	0.0242886	0.0254556	0.0239855	0.0236193	0.0242853	0.0250842	0.0231684	0.0295425	0.022836	0.0268137	0.0229124	0.0249083	0.0241394	0.0212036	0.0248019	0.0206683	0.0229885	0.0226052	0.0223802	0.0218686	0.0277194	0.0362386	0.023796	0.0241692	0.0237097	0.0237895	0.025232
Ploid4_3_GenomeCoverage	0.0306333	0.030387	0.0356506	0.0375179	0.0403064	0.0339976	0.0413307	0.0405609	0.0395048	0.0395283	0.0426957	0.0393794	0.0406229	0.043564	0.0378499	0.0368333	0.0405614	0.0378857	0.0392491	0.0396181	0.0416335	0.0400007	0.0299719	0.0307204	0.0297133	0.0301928	0.0299491	0.0304959	0.0403749	0.0389507	0.0370341	0.0364251	0.0305471	0.0371637	0.0272138	0.0396598	0.0265202	0.0368762	0.0306801	0.030217	0.0358757	0.0378257	0.0394876	0.0331509	0.0406443	0.0394648	0.0392258	0.039206	0.0420579
Ploid4_4_GenomeCoverage	0.0388427	0.0515145	0.0402229	0.0370735	0.0285909	0.00815056	0.031189	0.0263987	0.0347956	0.0307701	0.0291396	0.0336046	0.0322067	0.0251384	0.0269006	0.0362141	0.0257904	0.0211499	0.0260687	0.0234609	0.0227217	0.0266055	0.0471173	0.0412709	0.0477153	0.0491666	0.0475666	0.0435765	0.0335006	0.024726	0.0367384	0.0284935	0.0446739	0.0300491	0.0473325	0.035247	0.0489911	0.0418726	0.0371884	0.0492121	0.0374362	0.0349809	0.0266662	0.0077528	0.0293816	0.0252593	0.0332692	0.0293603	0.0272109
Ploid5_2_GenomeCoverage	0.012325	0.0123986	0.0117161	0.0114696	0.012954	0.0182065	0.011123	0.0117952	0.0119865	0.011757	0.0119392	0.0109752	0.0109276	0.0125822	0.012097	0.0121256	0.0127748	0.0142997	0.0122409	0.0137815	0.014854	0.0132154	0.0132371	0.0133789	0.0135835	0.0134135	0.0136607	0.0133723	0.0114291	0.0142031	0.0120527	0.0129209	0.0121674	0.0120627	0.0145596	0.0110237	0.0149406	0.0110763	0.0130621	0.0131507	0.0128472	0.0124841	0.0143979	0.0203776	0.01228	0.0127037	0.0127989	0.0127386	0.0132036
Ploid5_3_GenomeCoverage	0.0156673	0.0158782	0.0178101	0.0187177	0.0207955	0.0191757	0.0202688	0.0204333	0.0196057	0.0199047	0.0217324	0.0192176	0.0202518	0.0227498	0.0193987	0.0184361	0.0212554	0.0203228	0.0200816	0.0208557	0.0217538	0.020664	0.0153603	0.0161029	0.0152941	0.0152483	0.0151769	0.0157402	0.0201732	0.0204185	0.0182846	0.0192579	0.0157667	0.0193727	0.0143244	0.0188917	0.0137979	0.0173791	0.0169342	0.0170733	0.019244	0.0202526	0.0226591	0.0206445	0.0224754	0.0223595	0.0216666	0.0214244	0.0237062
Ploid5_4_GenomeCoverage	0.0251626	0.0313576	0.0265883	0.0251594	0.0208088	0.00653209	0.0229049	0.0191493	0.0242598	0.0220344	0.0208098	0.0238182	0.022995	0.0185302	0.0195972	0.0248051	0.0193716	0.016283	0.019212	0.017639	0.0170776	0.0195613	0.0293422	0.0266457	0.0293945	0.0303529	0.0293761	0.0277187	0.0237216	0.0179736	0.0246284	0.0203037	0.0286314	0.0212739	0.0274559	0.0248175	0.0285172	0.028227	0.0262229	0.0328554	0.0274747	0.0259475	0.0208868	0.00657894	0.0232809	0.0199618	0.0247901	0.0228868	0.0214273
Ploid6_2_GenomeCoverage	0.0101167	0.00971157	0.0095979	0.00940397	0.00977239	0.0140995	0.00907041	0.00913968	0.00938221	0.00932522	0.00918244	0.0089742	0.00901249	0.00957442	0.00952043	0.00931491	0.00973902	0.0104364	0.00958485	0.010215	0.0109088	0.00995656	0.0105144	0.0101165	0.0106783	0.0109274	0.0108302	0.0105369	0.00924508	0.0108232	0.00948497	0.0096823	0.0094744	0.0090712	0.0113554	0.00905396	0.0116652	0.00911873	0.0140781	0.0135324	0.0131605	0.0135192	0.0144853	0.0212437	0.01325	0.0133662	0.013422	0.0134823	0.0134084
Ploid6_3_GenomeCoverage	0.0123647	0.0126608	0.0129826	0.013976	0.014779	0.0173508	0.0145705	0.0148735	0.0141721	0.0143696	0.0150251	0.0141655	0.0145917	0.016219	0.0145539	0.0133585	0.0152262	0.0150654	0.0148591	0.0152864	0.0162961	0.0149377	0.0120084	0.0124479	0.0118161	0.0117592	0.0122082	0.0123557	0.0142323	0.0153068	0.0133357	0.0138861	0.0120685	0.0139347	0.011907	0.013753	0.0116812	0.0130417	0.0175944	0.0179628	0.018898	0.0197859	0.0216169	0.0248762	0.0215411	0.0222262	0.0202487	0.021217	0.0226198
Ploid6_4_GenomeCoverage	0.0324746	0.036807	0.0343814	0.0325168	0.0309796	0.0124617	0.0312377	0.0286096	0.0328986	0.0307946	0.0308916	0.0318516	0.0309688	0.0281716	0.0282884	0.0332566	0.0292833	0.0261251	0.0282566	0.0277316	0.0264966	0.0293521	0.0354492	0.0341525	0.0359932	0.0359057	0.0356627	0.0345371	0.0321936	0.0271635	0.032676	0.0306621	0.0356801	0.0316843	0.0329789	0.032477	0.0339443	0.0348536	0.0438788	0.0505733	0.0465392	0.0434829	0.0397576	0.014718	0.0406073	0.0365653	0.0444311	0.040379	0.0394673
[truncated: 65 more columns]

## Sheet: Table 6
Supplementary Table 6 Gene conversions between sweet potato subgenomes
Sweet potato cultivars	B2 to B1	B1 to B2	Other	Number of haplotype blocks	Tree method
Huarmeyano	0.0930181	0.389509	0.517473	13535	UPGMA
NASPOT5/58	0.0890174	0.393101	0.517881	14177	UPGMA
NK259L	0.0958921	0.386761	0.517347	16602	UPGMA
Yuzi7	0.090774	0.38477	0.524456	20854	UPGMA
Y601	0.090286	0.381024	0.52869	27867	UPGMA
